# Supplementary material for: Single Nucleotide Polymorphisms in CDKAL1 Gene Are Associated with Risk of Gestational Diabetes Mellitus in Chinese Population
Source: J Diabetes Res. 2019 Apr 14;2019:3618103. doi: 10.1155/2019/3618103 (PMC6487100; doi:10.1155/2019/3618103)
Supplement: Supplementary Materials — Supplementary Table 1: genes and SNPs evaluated. Supplementary Table 2: genotypes and risk of gestational diabetes mellitus. [file 3618103.f1.xlsx]

## Sheet: Supple. Table 1
	Supplementary Table 1. Genes and SNPs evaluated.
		Gene	Chromesome	SNP	Base Pair Position	Major allele	Minor Allele	HWE P
		CDKAL1	6	rs898167	21208417	C	A	6.555e-10
		CDKAL1	6	rs9358401	21217185	A	G	0.04146
		CDKAL1	6	rs9350276	20740296	A	G	0.06883
		CDKAL1	6	rs9295501	21182978	A	G	0.1373
		CDKAL1	6	rs2068072	21076770	C	A	0.1409
		CDKAL1	6	rs2328574	21223140	G	A	0.1428
		CDKAL1	6	rs2494728	21007887	T	A	0.153
		CDKAL1	6	rs72834308	20916326	G	A	0.1641
		CDKAL1	6	rs6905258	21012904	G	A	0.1692
		CDKAL1	6	rs9465982	21178282	A	G	0.1815
		CDKAL1	6	rs2819996	20755932	G	A	0.1986
		CDKAL1	6	rs9358383	20999387	A	G	0.2006
		CDKAL1	6	rs6938256	20887954	A	G	0.2129
		CDKAL1	6	rs12526927	21031501	A	C	0.2233
		CDKAL1	6	rs11965768	21165295	T	A	0.2242
		CDKAL1	6	rs16884616	21189437	G	A	0.248
		CDKAL1	6	rs72832315	20743501	C	A	0.251
		CDKAL1	6	rs7753271	20849412	G	A	0.2547
		CDKAL1	6	rs10946425	21018655	G	A	0.2583
		CDKAL1	6	rs6917599	20626409	G	A	0.276
		CDKAL1	6	rs9465851	20640316	G	A	0.294
		CDKAL1	6	rs9465991	21191928	A	G	0.2962
		CDKAL1	6	rs10456242	21205388	A	G	0.305
		CDKAL1	6	rs9366363	20858852	C	A	0.3143
		CDKAL1	6	rs6456397	21119130	A	G	0.3245
		CDKAL1	6	rs201312	21038835	A	G	0.3575
		CDKAL1	6	rs7765765	20922268	G	A	0.3631
		CDKAL1	6	rs9366354	20545468	G	A	0.3632
		CDKAL1	6	rs10946416	20883616	C	A	0.3635
		CDKAL1	6	rs13210277	21034656	G	A	0.3683
		CDKAL1	6	rs9466002	21224055	A	G	0.3792
		CDKAL1	6	rs7770752	21224517	C	A	0.384
		CDKAL1	6	rs9465985	21185590	A	G	0.3874
		CDKAL1	6	rs73386546	20543895	G	C	0.4012
		CDKAL1	6	rs9460540	20648762	A	G	0.4076
		CDKAL1	6	rs9350258	20556905	A	G	0.428
		CDKAL1	6	rs10484633	20631011	A	G	0.4304
		CDKAL1	6	rs67816138	20886303	A	C	0.4512
		CDKAL1	6	rs4712573	20966438	A	C	0.4826
		CDKAL1	6	rs1137970	21232615	A	G	0.4861
		CDKAL1	6	rs10946406	20758760	A	G	0.4973
		CDKAL1	6	rs12664336	21210903	G	A	0.5063
		CDKAL1	6	rs6932393	21005346	G	A	0.5093
		CDKAL1	6	rs201327	21046035	G	A	0.5093
		CDKAL1	6	rs9465850	20639409	G	A	0.5606
		CDKAL1	6	rs6904348	21090622	C	A	0.5727
		CDKAL1	6	rs1563726	21222095	G	A	0.6107
		CDKAL1	6	rs9466004	21224124	G	A	0.6107
		CDKAL1	6	rs7747724	20751315	A	G	0.6125
		CDKAL1	6	rs6937439	21130870	A	G	0.6332
		CDKAL1	6	rs9356744	20685486	A	G	0.6359
		CDKAL1	6	rs9295494	21131312	A	G	0.6361
		CDKAL1	6	rs9348440	20641336	G	A	0.6416
		CDKAL1	6	rs9358377	20903971	A	C	0.6431
		CDKAL1	6	rs6456369	20660365	A	G	0.6441
		CDKAL1	6	rs1004172	20954826	G	A	0.6651
		CDKAL1	6	rs9350319	21100044	A	G	0.6687
		CDKAL1	6	rs79034658	21094974	A	G	0.686
		CDKAL1	6	rs989969	21037940	C	A	0.6869
		CDKAL1	6	rs1466340	21146266	A	C	0.7094
		CDKAL1	6	rs4712585	21108114	A	G	0.7128
		CDKAL1	6	rs9368222	20686996	C	A	0.7211
		CDKAL1	6	rs7747752	20725423	C	G	0.7323
		CDKAL1	6	rs9350268	20620003	G	A	0.7329
		CDKAL1	6	rs1001310	21065787	A	G	0.7329
		CDKAL1	6	rs9295478	20716253	G	A	0.7339
		CDKAL1	6	rs6935599	20717095	A	G	0.7339
		CDKAL1	6	rs77373471	21091960	T	A	0.7364
		CDKAL1	6	rs12209806	20601785	G	A	0.7397
		CDKAL1	6	rs6926658	20585656	G	A	0.74
		CDKAL1	6	rs76376935	21027792	G	A	0.7507
		CDKAL1	6	rs12201217	21211797	G	A	0.7527
		CDKAL1	6	rs72657619	20929250	A	G	0.7745
		CDKAL1	6	rs12196595	20940379	G	A	0.7859
		CDKAL1	6	rs1980458	20973652	A	G	0.7936
		CDKAL1	6	rs6456382	20901311	A	G	0.7972
		CDKAL1	6	rs415446	21032682	A	G	0.7983
		CDKAL1	6	rs9368204	20580893	A	C	0.8194
		CDKAL1	6	rs4585542	20766103	G	A	0.8222
		CDKAL1	6	rs4712527	20663335	A	G	0.8557
		CDKAL1	6	rs10946415	20881386	G	A	0.8628
		CDKAL1	6	rs9465831	20611926	G	A	0.864
		CDKAL1	6	rs2064320	20570142	G	A	0.8679
		CDKAL1	6	rs898165	21208429	G	A	0.8721
		CDKAL1	6	rs9368283	21157173	G	A	0.8834
		CDKAL1	6	rs6928012	20728513	G	A	0.8993
		CDKAL1	6	rs4712556	20856703	G	A	0.9077
		CDKAL1	6	rs6456389	20990153	C	A	0.9088
		CDKAL1	6	rs16883932	20571360	A	G	1
		CDKAL1	6	rs16884072	20655503	A	G	1
		CDKAL1	6	rs7748720	20689945	A	G	1
		CDKAL1	6	rs13217519	20734994	A	G	1
		CDKAL1	6	rs4710944	20744727	G	A	1
		CDKAL1	6	rs12215519	20800635	C	G	1
		CDKAL1	6	rs4580857	20807204	A	G	1
		CDKAL1	6	rs9358372	20812588	G	A	1
		CDKAL1	6	rs10806925	20819976	A	G	1
		CDKAL1	6	rs7753109	20821489	G	A	1
		CDKAL1	6	rs4395717	20826281	C	A	1
		CDKAL1	6	rs4077405	20876683	G	A	1
		CDKAL1	6	rs4710958	20911003	G	A	1
		CDKAL1	6	rs12192642	21008739	G	A	1
		CDKAL1	6	rs9350314	21039284	A	G	1
		CDKAL1	6	rs9366375	21079573	A	G	1
		CDKAL1	6	rs62404499	21120723	G	A	1
		CDKAL1	6	rs10946430	21124521	G	A	1
		CDKAL1	6	rs10498701	21144599	G	A	1
		CDKAL1	6	rs9356770	21164249	G	A	1
		CDKAL1	6	rs12526391	21176124	G	A	1
		CDKAL1	6	rs9465989	21188017	G	A	1
		CDKAL1	6	rs35013686	21189286	G	A	1
		CDKAL1	6	rs1531303	21200015	T	A	1
		CDKAL1	6	rs62404549	21213574	A	C	1
		GCK	7	rs2268576	44189023	G	A	0.08883
		GCK	7	rs2971671	44211337	A	G	0.1933
		GCK	7	rs12535229	44205605	G	A	0.3116
		GCK	7	rs76029286	44205149	A	G	0.3825
		GCK	7	rs2300586	44218856	G	A	0.4086
		GCK	7	rs2268569	44227020	C	A	0.5295
		GCK	7	rs758986	44222225	G	C	0.6159
		GCK	7	rs2908297	44193404	G	A	0.6465
		GCK	7	rs59727929	44223558	G	A	0.6745
		GCK	7	rs2971669	44231778	G	A	0.7204
		GCK	7	rs3757840	44231216	A	C	0.8219
		GCK	7	rs12534623	44192203	A	G	0.9079
		GCK	7	rs2080033	44204322	A	G	1
		GCK	7	rs2908290	44216137	G	A	1
		GCK	7	rs3808320	44224098	G	A	1
		IGF2BP2	3	rs13076013	185464488	A	G	0.04357
		IGF2BP2	3	rs750753	185421647	G	A	0.1176
		IGF2BP2	3	rs6791275	185445144	G	A	0.1277
		IGF2BP2	3	rs6763887	185482618	A	G	0.4127
		IGF2BP2	3	rs9681668	185476453	G	A	0.4876
		IGF2BP2	3	rs4686393	185524116	A	G	0.6104
		IGF2BP2	3	rs6808808	185501238	G	A	0.6115
		IGF2BP2	3	rs74809279	185370153	C	A	0.6175
		IGF2BP2	3	rs13073992	185490240	A	C	0.7202
		IGF2BP2	3	rs16860234	185510884	A	C	0.7304
		IGF2BP2	3	rs10428126	185520342	A	G	0.7715
		IGF2BP2	3	rs62289077	185402576	G	A	1
		IGF2BP2	3	rs80061571	185431197	G	A	1
		IGF2BP2	3	rs17826758	185431283	A	G	1
		IGF2BP2	3	rs6784185	185473065	G	A	1
		IRS1	2	rs1560251	227653948	C	A	0.4408
		IRS1	2	rs59567095	227655778	G	A	0.6945
		IRS1	2	rs13431179	227610241	G	A	1
		IRS1	2	rs16822607	227618094	A	G	1
		KCNJ11	11	rs2285676	17408025	A	G	0.4313
		KCNQ1	11	rs1116714	2617782	C	A	0.002126
		KCNQ1	11	rs4930129	2619390	A	C	0.006172
		KCNQ1	11	rs2237881	2788916	A	G	0.03092
		KCNQ1	11	rs151293	2841365	C	A	0.0437
		KCNQ1	11	rs12794000	2800669	G	A	0.04961
		KCNQ1	11	rs2283216	2753063	G	A	0.05321
		KCNQ1	11	rs61869764	2814445	A	G	0.0544
		KCNQ1	11	rs2283222	2755601	A	G	0.05918
		KCNQ1	11	rs234852	2850782	G	A	0.07814
		KCNQ1	11	rs7924915	2536131	G	A	0.09133
		KCNQ1	11	rs231362	2691471	G	A	0.09155
		KCNQ1	11	rs233446	2837625	A	C	0.09569
		KCNQ1	11	rs231348	2673681	G	A	0.09755
		KCNQ1	11	rs6578283	2673575	A	G	0.1011
		KCNQ1	11	rs10766212	2633152	G	A	0.1311
		KCNQ1	11	rs10832548	2718977	G	A	0.136
		KCNQ1	11	rs78131	2727517	G	A	0.136
		KCNQ1	11	rs2283171	2595287	G	A	0.1384
		KCNQ1	11	rs234866	2857897	G	A	0.1519
		KCNQ1	11	rs231908	2751660	G	A	0.1612
		KCNQ1	11	rs2283174	2603026	A	G	0.1774
		KCNQ1	11	rs16928429	2563245	A	G	0.1815
		KCNQ1	11	rs2074196	2824800	C	A	0.1952
		KCNQ1	11	rs79850634	2868699	A	G	0.1977
		KCNQ1	11	rs2237888	2832905	G	A	0.2015
		KCNQ1	11	rs7130209	2566400	A	G	0.2365
		KCNQ1	11	rs72844254	2757228	A	C	0.244
		KCNQ1	11	rs2283175	2612561	G	A	0.2462
		KCNQ1	11	rs800336	2473131	A	G	0.2536
		KCNQ1	11	rs757086	2556255	G	A	0.2624
		KCNQ1	11	rs234875	2810418	C	A	0.2744
		KCNQ1	11	rs77307322	2537091	G	A	0.2838
		KCNQ1	11	rs112908040	2762998	G	A	0.2948
		KCNQ1	11	rs3944148	2563137	G	A	0.297
		KCNQ1	11	rs231915	2749015	A	G	0.2981
		KCNQ1	11	rs2283196	2725752	A	C	0.3033
		KCNQ1	11	rs11023096	2528003	G	A	0.3046
		KCNQ1	11	rs2237882	2791208	G	A	0.311
		KCNQ1	11	rs4930000	2623009	G	A	0.3152
		KCNQ1	11	rs231841	2723604	A	C	0.3174
		KCNQ1	11	rs170786	2750703	G	A	0.3284
		KCNQ1	11	rs231359	2694606	A	C	0.3385
		KCNQ1	11	rs4930122	2577393	A	G	0.3482
		KCNQ1	11	rs163171	2821065	G	A	0.3561
		KCNQ1	11	rs2237869	2537751	C	A	0.3585
		KCNQ1	11	rs231907	2752130	T	A	0.3712
		KCNQ1	11	rs1110724	2754582	G	A	0.3949
		KCNQ1	11	rs11824286	2472055	G	A	0.4201
		KCNQ1	11	rs10832134	2502486	A	G	0.4237
		KCNQ1	11	rs1080015	2511527	A	G	0.4237
		KCNQ1	11	rs11023999	2778083	G	A	0.4248
		KCNQ1	11	rs2283205	2741327	G	A	0.4436
		KCNQ1	11	rs163183	2844441	G	A	0.4887
		KCNQ1	11	rs2283152	2544871	A	G	0.5026
		KCNQ1	11	rs2237893	2839899	G	A	0.5132
		KCNQ1	11	rs72847583	2859536	C	G	0.5295
		KCNQ1	11	rs61509816	2563634	G	A	0.5362
		KCNQ1	11	rs2237899	2866248	G	A	0.5565
		KCNQ1	11	rs2283200	2729340	G	A	0.5646
		KCNQ1	11	rs12419347	2868259	G	A	0.5915
		KCNQ1	11	rs179435	2553703	A	G	0.5957
		KCNQ1	11	rs548566	2782648	A	G	0.6178
		KCNQ1	11	rs12575958	2647632	G	A	0.6229
		KCNQ1	11	rs12576239	2502319	G	A	0.6241
		KCNQ1	11	rs117241550	2701476	A	T	0.6248
		KCNQ1	11	rs2283202	2737905	G	A	0.6251
		KCNQ1	11	rs7926356	2582525	G	A	0.6368
		KCNQ1	11	rs7924946	2776809	G	A	0.6432
		KCNQ1	11	rs4539307	2573121	G	A	0.6434
		KCNQ1	11	rs179785	2781519	G	A	0.654
		KCNQ1	11	rs61871517	2603319	G	A	0.6852
		KCNQ1	11	rs7938807	2728068	C	A	0.7069
		KCNQ1	11	rs179431	2552148	G	A	0.7109
		KCNQ1	11	rs3815064	2495515	G	A	0.7203
		KCNQ1	11	rs3864884	2482092	G	A	0.7297
		KCNQ1	11	rs11023793	2709733	A	G	0.7414
		KCNQ1	11	rs11023996	2776448	A	G	0.7554
		KCNQ1	11	rs7101739	2584903	G	A	0.7746
		KCNQ1	11	rs736609	2538580	G	A	0.7918
		KCNQ1	11	rs12805655	2747519	G	A	0.8431
		KCNQ1	11	rs6578270	2537548	A	G	0.8619
		KCNQ1	11	rs11523905	2498259	A	G	0.8793
		KCNQ1	11	rs231877	2783676	A	C	0.8859
		KCNQ1	11	rs10832417	2652657	C	A	0.8986
		KCNQ1	11	rs11604980	2494017	G	A	1
		KCNQ1	11	rs4929992	2528233	G	A	1
		KCNQ1	11	rs2011750	2534483	A	C	1
		KCNQ1	11	rs2283169	2580299	A	G	1
		KCNQ1	11	rs7118348	2588236	A	T	1
		KCNQ1	11	rs147604023	2601144	A	G	1
		KCNQ1	11	rs2012323	2604437	G	A	1
		KCNQ1	11	rs58833300	2613203	A	G	1
		KCNQ1	11	rs4930137	2630594	A	G	1
		KCNQ1	11	rs2106467	2635797	C	A	1
		KCNQ1	11	rs61870802	2692442	G	A	1
		KCNQ1	11	rs7128926	2696744	A	G	1
		KCNQ1	11	rs231358	2702513	A	G	1
		KCNQ1	11	rs60837062	2704155	A	G	1
		KCNQ1	11	rs75643572	2706790	G	A	1
		KCNQ1	11	rs231351	2711142	G	A	1
		KCNQ1	11	rs231846	2736601	C	A	1
		KCNQ1	11	rs231884	2741732	C	G	1
		KCNQ1	11	rs231916	2748368	G	A	1
		KCNQ1	11	rs463535	2781670	G	A	1
		KCNQ1	11	rs4255520	2785623	A	G	1
		KCNQ1	11	rs12420943	2794293	G	A	1
		KCNQ1	11	rs74049757	2801358	G	A	1
		KCNQ1	11	rs149373	2810380	A	G	1
		KCNQ1	11	rs234838	2818292	A	G	1
		KCNQ1	11	rs59809880	2829807	G	A	1
		KCNQ1	11	rs163182	2844216	C	G	1
		TCF7L2	10	rs7085532	114859463	G	A	0.0006385
		TCF7L2	10	rs12243326	114788815	A	G	0.06931
		TCF7L2	10	rs1225404	114914665	A	G	0.08209
		TCF7L2	10	rs58233689	114735065	G	C	0.08418
		TCF7L2	10	rs4132670	114767771	G	A	0.1003
		TCF7L2	10	rs61875105	114722935	A	G	0.1176
		TCF7L2	10	rs7919409	114824976	A	G	0.1273
		TCF7L2	10	rs4918792	114843949	G	A	0.1424
		TCF7L2	10	rs72641339	114856526	A	C	0.1438
		TCF7L2	10	rs11196224	114855397	G	A	0.1634
		TCF7L2	10	rs3750804	114833850	G	A	0.1922
		TCF7L2	10	rs966227	114846766	A	G	0.1982
		TCF7L2	10	rs7919152	114794719	G	A	0.2653
		TCF7L2	10	rs6585201	114768783	G	A	0.2947
		TCF7L2	10	rs290475	114874019	A	G	0.3232
		TCF7L2	10	rs7092484	114760933	G	A	0.338
		TCF7L2	10	rs7908486	114834498	G	A	0.3536
		TCF7L2	10	rs12265291	114810240	A	G	0.3638
		TCF7L2	10	rs7904519	114773927	A	G	0.3878
		TCF7L2	10	rs4277044	114835452	G	A	0.3878
		TCF7L2	10	rs73362207	114901575	A	G	0.3919
		TCF7L2	10	rs290474	114874373	G	A	0.4104
		TCF7L2	10	rs73360281	114887817	A	G	0.4313
		TCF7L2	10	rs7094463	114711983	A	G	0.4884
		TCF7L2	10	rs1555485	114912534	G	A	0.5399
		TCF7L2	10	rs11196212	114821249	A	G	0.6061
		TCF7L2	10	rs10885417	114893682	C	A	0.6458
		TCF7L2	10	rs12772424	114880551	T	A	0.7062
		TCF7L2	10	rs2296782	114723857	G	A	0.8773
		TCF7L2	10	rs6585196	114737050	A	G	0.878
		TCF7L2	10	rs7901275	114732906	C	A	0.8896
		TCF7L2	10	rs290487	114909731	A	G	0.9058
		TCF7L2	10	rs138820252	114712021	G	A	1
		TCF7L2	10	rs11196172	114726843	A	G	1
		TCF7L2	10	rs72826065	114735521	A	G	1
		TCF7L2	10	rs114204952	114735722	A	G	1
		TCF7L2	10	rs55972445	114782790	C	A	1
		TCF7L2	10	rs7076754	114797893	G	A	1
		TCF7L2	10	rs35010564	114864425	A	C	1
		TCF7L2	10	rs4917645	114884967	G	A	1
		TCF7L2	10	rs1362943	114888608	G	A	1
		TCF7L2	10	rs3814573	114898093	A	G	1
		TCF7L2	10	rs7912600	114900499	A	G	1
		TCF7L2	10	rs290491	114904534	T	A	1

## Sheet: Supple. Table 2
	Supplementary Table 2. Genotypes and risk of Gestational Diabetes Mellitus.
		SNPs	genotype	Cases	Controls	OR	95%CI	P
		IRS1 rs13431179
			GG	150	135	1
			GA	135	151	1.24	0.88 - 1.74	0.213104
			AA	31	35	1.29	0.75 - 2.23	0.365892
			GA or AA	166	186	1.25	0.91 - 1.72	0.175415
			Trend			1.17	0.92 - 1.49	0.202308
			Recessive			1.16	0.69 - 1.95	0.58125
		IRS1 rs16822607
			AA	261	277	1
			AG	53	42	0.73	0.46 - 1.14	0.169184
			GG	2	2	1.03	0.12 - 8.93	0.975691
			AG or GG	55	44	0.74	0.47 - 1.15	0.181232
			Trend			0.77	0.5 - 1.16	0.214098
			Recessive			1.08	0.12 - 9.32	0.941969
		IRS1 rs1560251
			CC	188	176	1
			CA	108	130	1.32	0.95 - 1.85	0.102111
			AA	20	15	0.77	0.37 - 1.57	0.473706
			CA or AA	128	145	1.23	0.89 - 1.7	0.201146
			Trend			1.09	0.84 - 1.43	0.509165
			Recessive			0.69	0.34 - 1.39	0.301887
		IRS1 rs59567095
			GG	271	287	1
			GA	43	33	0.8	0.49 - 1.31	0.377865
			AA	2	1	0.36	0.02 - 3.91	0.414572
			GA or AA	45	34	0.78	0.47 - 1.26	0.306967
			Trend			0.77	0.48 - 1.21	0.26014
			Recessive			0.37	0.02 - 3.99	0.424545
		IGF2BP2 rs74809279
			CC	277	266	1
			CA	39	54	1.7	1.08 - 2.69	0.0235861
			AA	0	1	1.07301e+06	0 -	0.979309
			CA or AA	39	55	1.73	1.1 - 2.75	0.0183033
			Trend			1.75	1.12 - 2.76	0.0147019
			Recessive			992024	0 -	0.979426
		IGF2BP2 rs62289077
			GG	278	280	1
			GA	37	39	0.99	0.61 - 1.62	0.968792
			AA	1	2	3.27	0.3 - 71.95	0.341148
			GA or AA	38	41	1.04	0.64 - 1.68	0.882628
			Trend			1.08	0.68 - 1.71	0.738645
			Recessive			3.27	0.3 - 71.99	0.340701
		IGF2BP2 rs750753
			GG	174	160	1
			GA	113	140	1.44	1.03 - 2.02	0.0346852
			AA	29	21	0.88	0.47 - 1.63	0.690812
			GA or AA	142	161	1.33	0.96 - 1.83	0.083253
			Trend			1.13	0.88 - 1.46	0.3358
			Recessive			0.75	0.41 - 1.36	0.348284
		IGF2BP2 rs80061571
			GG	309	309	1
			GA	7	12	1.52	0.58 - 4.26	0.397779
			GA or AA	7	12	1.52	0.58 - 4.26	0.397779
			Trend			1.52	0.58 - 4.26	0.397779
			Recessive					0.186887
		IGF2BP2 rs17826758
			AA	302	309	1
			AG	12	11	0.87	0.37 - 2.05	0.754771
			AG or GG	12	11	0.87	0.37 - 2.05	0.754771
			Trend			0.87	0.37 - 2.05	0.754771
			Recessive					0.175808
		IGF2BP2 rs6791275
			GG	148	136	1
			GA	126	155	1.46	1.04 - 2.06	0.0303289
			AA	41	29	0.83	0.48 - 1.43	0.510501
			GA or AA	167	184	1.31	0.94 - 1.81	0.106778
			Trend			1.07	0.84 - 1.36	0.597924
			Recessive			0.69	0.41 - 1.15	0.154739
		IGF2BP2 rs13076013
			AA	309	316	1
			AG	6	5	0.7	0.2 - 2.4	0.570799
			GG	1	0	0	-6.19905e+41	0.980815
			AG or GG	7	5	0.64	0.18 - 2.07	0.459197
			Trend			0.62	0.18 - 1.81	0.40082
			Recessive			0	-6.18236e+41	0.980811
		IGF2BP2 rs6784185
			GG	188	182	1
			GA	111	124	1.21	0.86 - 1.69	0.269423
			AA	17	15	0.93	0.44 - 1.95	0.839311
			GA or AA	128	139	1.17	0.85 - 1.62	0.339992
			Trend			1.09	0.84 - 1.43	0.516697
			Recessive			0.86	0.41 - 1.79	0.68816
		IGF2BP2 rs9681668
			GG	288	290	1
			GA	27	31	1.15	0.66 - 2	0.624037
			AA	1	0	0	-1.9894e+41	0.979122
			GA or AA	28	31	1.1	0.63 - 1.9	0.739537
			Trend			1.04	0.61 - 1.79	0.873439
			Recessive			0	-1.96568e+41	0.979103
		IGF2BP2 rs6763887
			AA	119	115	1
			AG	143	165	1.29	0.91 - 1.83	0.157347
			GG	54	41	0.84	0.51 - 1.37	0.485326
			AG or GG	197	206	1.16	0.83 - 1.63	0.371084
			Trend			0.99	0.78 - 1.25	0.916289
			Recessive			0.73	0.46 - 1.14	0.162212
		IGF2BP2 rs13073992
			AA	205	205	1
			AC	96	107	1.17	0.83 - 1.65	0.376099
			CC	13	8	0.6	0.23 - 1.49	0.280135
			AC or CC	109	115	1.1	0.79 - 1.53	0.579772
			Trend			1.01	0.76 - 1.35	0.928964
			Recessive			0.57	0.22 - 1.41	0.231502
		IGF2BP2 rs6808808
			GG	278	283	1
			GA	37	37	1.02	0.62 - 1.68	0.928
			AA	0	1	894607	0 -	0.97958
			GA or AA	37	38	1.05	0.64 - 1.73	0.834882
			Trend			1.09	0.67 - 1.76	0.737942
			Recessive			892361	0 -	0.979584
		IGF2BP2 rs16860234
			AA	202	211	1
			AC	100	102	1.04	0.74 - 1.47	0.823133
			CC	14	8	0.54	0.21 - 1.33	0.193934
			AC or CC	114	110	0.98	0.7 - 1.36	0.897081
			Trend			0.92	0.69 - 1.23	0.578298
			Recessive			0.54	0.21 - 1.31	0.181427
		IGF2BP2 rs10428126
			AA	172	181	1
			AG	119	121	1.01	0.73 - 1.42	0.932966
			GG	23	18	0.8	0.41 - 1.56	0.523535
			AG or GG	142	139	0.98	0.71 - 1.35	0.908362
			Trend			0.95	0.74 - 1.24	0.718368
			Recessive			0.8	0.41 - 1.53	0.503169
		IGF2BP2 rs4686393
			AA	279	284	1
			AG	36	36	1.01	0.61 - 1.67	0.968795
			GG	0	1	898444	0 -	0.979574
			AG or GG	36	37	1.04	0.63 - 1.72	0.873362
			Trend			1.07	0.66 - 1.75	0.773119
			Recessive			897467	0 -	0.979575
		CDKAL1 rs73386546
			GG	225	232	1
			GC	81	83	0.96	0.67 - 1.39	0.840396
			CC	10	5	0.49	0.15 - 1.45	0.216199
			GC or CC	91	88	0.91	0.64 - 1.3	0.617875
			Trend			0.88	0.64 - 1.2	0.417194
			Recessive			0.5	0.15 - 1.46	0.221097
		CDKAL1 rs9366354
			GG	93	99	1
			GA	166	167	0.98	0.68 - 1.41	0.920645
			AA	57	55	0.92	0.57 - 1.48	0.731715
			GA or AA	223	222	0.97	0.68 - 1.37	0.843974
			Trend			0.96	0.76 - 1.22	0.747294
			Recessive			0.93	0.61 - 1.41	0.73612
		CDKAL1 rs9350258
			AA	92	100	1
			AG	165	164	0.95	0.66 - 1.36	0.763368
			GG	59	57	0.89	0.55 - 1.42	0.623775
			AG or GG	224	221	0.93	0.66 - 1.32	0.68313
			Trend			0.94	0.75 - 1.19	0.620585
			Recessive			0.92	0.61 - 1.39	0.694055
		CDKAL1 rs2064320
			GG	196	210	1
			GA	105	107	0.94	0.67 - 1.33	0.743086
			AA	15	4	0.28	0.08 - 0.81	0.0300323
			GA or AA	120	111	0.87	0.62 - 1.21	0.398052
			Trend			0.81	0.6 - 1.08	0.14804
			Recessive			0.29	0.08 - 0.82	0.0317571
		CDKAL1 rs16883932
			AA	305	315	1
			AG	10	6	0.63	0.21 - 1.72	0.374268
			AG or GG	10	6	0.63	0.21 - 1.72	0.374268
			Trend			0.63	0.21 - 1.72	0.374268
			Recessive					0.175007
		CDKAL1 rs9368204
			AA	99	103	1
			AC	159	163	1	0.7 - 1.44	0.978702
			CC	58	55	0.92	0.57 - 1.47	0.713864
			AC or CC	217	218	0.98	0.7 - 1.38	0.912081
			Trend			0.96	0.77 - 1.21	0.753917
			Recessive			0.91	0.6 - 1.38	0.667068
		CDKAL1 rs6926658
			GG	195	181	1
			GA	104	123	1.28	0.91 - 1.79	0.155455
			AA	16	16	1.04	0.5 - 2.19	0.910756
			GA or AA	120	139	1.24	0.9 - 1.72	0.184306
			Trend			1.16	0.88 - 1.51	0.292182
			Recessive			0.95	0.46 - 1.97	0.891113
		CDKAL1 rs12209806
			GG	195	181	1
			GA	104	125	1.3	0.93 - 1.82	0.122875
			AA	16	15	0.95	0.45 - 2.02	0.903139
			GA or AA	120	140	1.26	0.91 - 1.74	0.167906
			Trend			1.15	0.88 - 1.51	0.31294
			Recessive			0.86	0.41 - 1.81	0.695105
		CDKAL1 rs9465831
			GG	200	220	1
			GA	102	97	0.86	0.61 - 1.21	0.389636
			AA	14	4	0.28	0.08 - 0.8	0.0269789
			GA or AA	116	101	0.79	0.57 - 1.11	0.170356
			Trend			0.75	0.56 - 1.01	0.0574178
			Recessive			0.29	0.08 - 0.83	0.0324954
		CDKAL1 rs9350268
			GG	96	102	1
			GA	161	167	1	0.7 - 1.44	0.992163
			AA	59	52	0.82	0.51 - 1.31	0.400511
			GA or AA	220	219	0.95	0.67 - 1.34	0.773238
			Trend			0.92	0.73 - 1.16	0.465232
			Recessive			0.81	0.54 - 1.24	0.336646
		CDKAL1 rs6917599
			GG	132	156	1
			GA	137	139	0.85	0.6 - 1.18	0.329844
			AA	47	25	0.46	0.26 - 0.78	0.00503591
			GA or AA	184	164	0.75	0.54 - 1.03	0.0730735
			Trend			0.73	0.57 - 0.93	0.0099331
			Recessive			0.5	0.29 - 0.83	0.00842669
		CDKAL1 rs10484633
			AA	219	226	1
			AG	86	88	0.99	0.69 - 1.42	0.97214
			GG	11	7	0.64	0.23 - 1.71	0.385188
			AG or GG	97	95	0.96	0.68 - 1.35	0.796
			Trend			0.93	0.68 - 1.25	0.617035
			Recessive			0.65	0.23 - 1.7	0.384609
		CDKAL1 rs9465850
			GG	109	101	1
			GA	159	159	1.09	0.77 - 1.56	0.61968
			AA	48	60	1.38	0.86 - 2.22	0.184478
			GA or AA	207	219	1.16	0.83 - 1.63	0.38668
			Trend			1.16	0.92 - 1.46	0.206096
			Recessive			1.31	0.86 - 2	0.216362
		CDKAL1 rs9465851
			GG	107	107	1
			GA	162	153	0.95	0.67 - 1.36	0.783705
			AA	47	60	1.29	0.8 - 2.08	0.291324
			GA or AA	209	213	1.03	0.73 - 1.44	0.869977
			Trend			1.1	0.88 - 1.39	0.408016
			Recessive			1.33	0.87 - 2.04	0.188398
		CDKAL1 rs9348440
			GG	108	96	1
			GA	158	159	1.15	0.8 - 1.65	0.446735
			AA	50	65	1.47	0.92 - 2.36	0.106732
			GA or AA	208	224	1.23	0.87 - 1.72	0.237372
			Trend			1.2	0.96 - 1.51	0.1137
			Recessive			1.35	0.89 - 2.05	0.154728
		CDKAL1 rs9460540
			AA	116	111	1
			AG	157	157	1.05	0.74 - 1.49	0.771818
			GG	43	53	1.29	0.79 - 2.11	0.305931
			AG or GG	200	210	1.1	0.79 - 1.54	0.556017
			Trend			1.12	0.89 - 1.41	0.349775
			Recessive			1.25	0.8 - 1.96	0.320653
		CDKAL1 rs16884072
			AA	304	310	1
			AG	12	11	0.86	0.37 - 2.02	0.734538
			AG or GG	12	11	0.86	0.37 - 2.02	0.734538
			Trend			0.86	0.37 - 2.02	0.734538
			Recessive					0.186887
		CDKAL1 rs6456369
			AA	106	91	1
			AG	159	165	1.22	0.85 - 1.75	0.279472
			GG	51	65	1.49	0.93 - 2.38	0.0985327
			AG or GG	210	230	1.29	0.91 - 1.81	0.151032
			Trend			1.22	0.97 - 1.54	0.0919115
			Recessive			1.31	0.87 - 1.99	0.195713
		CDKAL1 rs4712527
			AA	208	245	1
			AG	96	73	0.64	0.44 - 0.92	0.0153593
			GG	12	3	0.21	0.05 - 0.69	0.0187384
			AG or GG	108	76	0.59	0.41 - 0.84	0.00343064
			Trend			0.59	0.43 - 0.81	0.00110995
			Recessive			0.24	0.05 - 0.77	0.0292233
		CDKAL1 rs9356744
			AA	118	94	1
			AG	153	163	1.38	0.97 - 1.97	0.0774993
			GG	44	63	1.8	1.11 - 2.91	0.0170045
			AG or GG	197	226	1.47	1.05 - 2.07	0.0248846
			Trend			1.35	1.07 - 1.7	0.0122213
			Recessive			1.48	0.97 - 2.29	0.0731852
		CDKAL1 rs9368222
			CC	119	95	1
			CA	153	163	1.37	0.96 - 1.95	0.0851279
			AA	44	63	1.79	1.11 - 2.9	0.0178713
			CA or AA	197	226	1.46	1.04 - 2.05	0.0275344
			Trend			1.34	1.06 - 1.7	0.0131342
			Recessive			1.48	0.97 - 2.29	0.0726725
		CDKAL1 rs7748720
			AA	193	241	1
			AG	107	75	0.57	0.39 - 0.81	0.00186256
			GG	15	3	0.15	0.03 - 0.47	0.00324332
			AG or GG	122	78	0.51	0.36 - 0.72	0.00016804
			Trend			0.51	0.37 - 0.7	2.902e-05
			Recessive			0.18	0.04 - 0.55	0.00697609
		CDKAL1 rs9295478
			GG	93	72	1
			GA	160	149	1.22	0.83 - 1.8	0.319875
			AA	63	100	2.08	1.33 - 3.27	0.00146335
			GA or AA	223	249	1.46	1.01 - 2.1	0.0421842
			Trend			1.44	1.15 - 1.81	0.00152941
			Recessive			1.83	1.26 - 2.66	0.00149106
		CDKAL1 rs6935599
			AA	93	72	1
			AG	160	149	1.22	0.83 - 1.8	0.313529
			GG	63	99	2.05	1.31 - 3.22	0.00186098
			AG or GG	223	248	1.45	1.01 - 2.1	0.0444085
			Trend			1.43	1.14 - 1.79	0.00194853
			Recessive			1.8	1.24 - 2.62	0.00205885
		CDKAL1 rs7747752
			CC	96	76	1
			CG	159	153	1.26	0.86 - 1.84	0.242797
			GG	60	92	1.96	1.25 - 3.09	0.00350643
			CG or GG	219	245	1.45	1.01 - 2.08	0.0422923
			Trend			1.39	1.11 - 1.75	0.00383869
			Recessive			1.69	1.16 - 2.48	0.00639542
		CDKAL1 rs6928012
			GG	142	148	1
			GA	138	141	1	0.72 - 1.4	0.985655
			AA	35	32	0.83	0.48 - 1.42	0.492542
			GA or AA	173	173	0.97	0.7 - 1.33	0.832681
			Trend			0.94	0.74 - 1.2	0.61965
			Recessive			0.83	0.49 - 1.39	0.467706
		CDKAL1 rs13217519
			AA	133	129	1
			AG	144	138	0.99	0.7 - 1.4	0.969546
			GG	39	54	1.46	0.9 - 2.39	0.128534
			AG or GG	183	192	1.09	0.79 - 1.51	0.585005
			Trend			1.15	0.92 - 1.45	0.225027
			Recessive			1.47	0.93 - 2.32	0.100582
		CDKAL1 rs9350276
			AA	155	188	1
			AG	122	110	0.74	0.52 - 1.04	0.082507
			GG	39	23	0.46	0.26 - 0.81	0.0081106
			AG or GG	161	133	0.67	0.49 - 0.92	0.0142977
			Trend			0.7	0.55 - 0.89	0.00421858
			Recessive			0.52	0.3 - 0.9	0.0214956
		CDKAL1 rs72832315
			CC	147	128	1
			CA	130	143	1.27	0.9 - 1.79	0.180691
			AA	39	50	1.52	0.93 - 2.48	0.0961806
			CA or AA	169	193	1.32	0.96 - 1.83	0.0883585
			Trend			1.24	0.99 - 1.56	0.0655948
			Recessive			1.35	0.85 - 2.14	0.201979
		CDKAL1 rs4710944
			GG	300	313	1
			GA	16	8	0.48	0.19 - 1.12	0.0981096
			GA or AA	16	8	0.48	0.19 - 1.12	0.0981096
			Trend			0.48	0.19 - 1.12	0.0981096
			Recessive					0.186887
		CDKAL1 rs7747724
			AA	200	228	1
			AG	101	79	0.67	0.47 - 0.96	0.0292017
			GG	15	12	0.62	0.27 - 1.38	0.239386
			AG or GG	116	91	0.66	0.47 - 0.93	0.0189575
			Trend			0.72	0.54 - 0.95	0.0232874
			Recessive			0.7	0.31 - 1.54	0.373902
		CDKAL1 rs2819996
			GG	150	126	1
			GA	128	145	1.35	0.96 - 1.9	0.0898335
			AA	38	50	1.62	0.99 - 2.66	0.0550764
			GA or AA	166	195	1.41	1.02 - 1.95	0.0370045
			Trend			1.29	1.03 - 1.63	0.0290671
			Recessive			1.4	0.88 - 2.22	0.156808
		CDKAL1 rs10946406
			AA	200	230	1
			AG	100	79	0.67	0.47 - 0.96	0.0310801
			GG	16	12	0.57	0.25 - 1.24	0.15915
			AG or GG	116	91	0.66	0.47 - 0.93	0.0165741
			Trend			0.71	0.53 - 0.94	0.0169545
			Recessive			0.64	0.28 - 1.39	0.260674
		CDKAL1 rs4585542
			GG	90	98	1
			GA	159	152	0.89	0.61 - 1.29	0.535752
			AA	67	71	1	0.64 - 1.57	0.997905
			GA or AA	226	223	0.92	0.65 - 1.31	0.649485
			Trend			0.99	0.79 - 1.24	0.937164
			Recessive			1.08	0.73 - 1.58	0.712151
		CDKAL1 rs12215519
			CC	301	313	1
			CG	15	8	0.52	0.2 - 1.24	0.150073
			CG or GG	15	8	0.52	0.2 - 1.24	0.150073
			Trend			0.52	0.2 - 1.24	0.150073
			Recessive					0.186887
		CDKAL1 rs4580857
			AA	267	296	1
			AG	47	24	0.48	0.28 - 0.8	0.00632481
			GG	2	1	0.25	0.01 - 2.85	0.27801
			AG or GG	49	25	0.46	0.27 - 0.78	0.0039942
			Trend			0.48	0.29 - 0.78	0.00357626
			Recessive			0.27	0.01 - 3.06	0.302657
		CDKAL1 rs9358372
			GG	88	97	1
			GA	157	153	0.88	0.61 - 1.28	0.512392
			AA	71	71	0.93	0.6 - 1.46	0.762879
			GA or AA	228	224	0.9	0.63 - 1.27	0.548715
			Trend			0.96	0.77 - 1.2	0.721222
			Recessive			1.01	0.69 - 1.48	0.965369
		CDKAL1 rs10806925
			AA	88	93	1
			AG	157	155	0.94	0.64 - 1.36	0.728842
			GG	71	71	0.97	0.62 - 1.53	0.911301
			AG or GG	228	226	0.95	0.67 - 1.35	0.766053
			Trend			0.98	0.79 - 1.23	0.887747
			Recessive			1.02	0.69 - 1.49	0.934573
		CDKAL1 rs7753109
			GG	262	295	1
			GA	52	24	0.42	0.25 - 0.7	0.00114118
			AA	2	1	0.25	0.01 - 2.81	0.272381
			GA or AA	54	25	0.41	0.24 - 0.68	0.00070784
			Trend			0.43	0.26 - 0.69	0.00069365
			Recessive			0.27	0.01 - 3.07	0.304693
		CDKAL1 rs4395717
			CC	88	97	1
			CA	158	153	0.88	0.61 - 1.27	0.49625
			AA	70	71	0.94	0.6 - 1.48	0.799384
			CA or AA	228	224	0.9	0.63 - 1.27	0.548715
			Trend			0.96	0.77 - 1.21	0.751407
			Recessive			1.02	0.7 - 1.5	0.909609
		CDKAL1 rs7753271
			GG	146	127	1
			GA	131	147	1.29	0.91 - 1.82	0.146692
			AA	39	46	1.4	0.85 - 2.31	0.184988
			GA or AA	170	193	1.32	0.95 - 1.82	0.0967151
			Trend			1.21	0.96 - 1.53	0.105431
			Recessive			1.23	0.77 - 1.97	0.383727
		CDKAL1 rs4712556
			GG	107	116	1
			GA	156	147	0.87	0.61 - 1.24	0.432968
			AA	53	58	1.02	0.64 - 1.63	0.922324
			GA or AA	209	205	0.91	0.65 - 1.27	0.565975
			Trend			0.99	0.79 - 1.24	0.90351
			Recessive			1.11	0.73 - 1.69	0.620477
		CDKAL1 rs9366363
			CC	144	130	1
			CA	133	144	1.19	0.85 - 1.68	0.316039
			AA	39	47	1.38	0.84 - 2.27	0.206557
			CA or AA	172	191	1.23	0.89 - 1.7	0.201922
			Trend			1.18	0.94 - 1.48	0.163294
			Recessive			1.26	0.79 - 2.01	0.330256
		CDKAL1 rs4077405
			GG	89	97	1
			GA	157	152	0.89	0.62 - 1.3	0.554628
			AA	70	72	0.97	0.62 - 1.51	0.883909
			GA or AA	227	224	0.92	0.65 - 1.3	0.624286
			Trend			0.98	0.78 - 1.22	0.838052
			Recessive			1.04	0.71 - 1.52	0.852945
		CDKAL1 rs10946415
			GG	201	226	1
			GA	101	83	0.71	0.49 - 1.01	0.0547477
			AA	14	10	0.58	0.24 - 1.35	0.208734
			GA or AA	115	93	0.69	0.49 - 0.97	0.0331058
			Trend			0.73	0.54 - 0.97	0.0313261
			Recessive			0.64	0.27 - 1.49	0.307472
		CDKAL1 rs10946416
			CC	210	229	1
			CA	92	81	0.8	0.56 - 1.14	0.220956
			AA	14	11	0.65	0.28 - 1.5	0.317663
			CA or AA	106	92	0.78	0.55 - 1.1	0.154803
			Trend			0.8	0.6 - 1.07	0.13619
			Recessive			0.7	0.3 - 1.59	0.393888
		CDKAL1 rs67816138
			AA	267	295	1
			AC	46	24	0.48	0.28 - 0.82	0.00769223
			CC	3	1	0.19	0.01 - 1.61	0.165753
			AC or CC	49	25	0.46	0.27 - 0.77	0.00369411
			Trend			0.48	0.29 - 0.77	0.0028237
			Recessive			0.2	0.01 - 1.73	0.184447
		CDKAL1 rs6938256
			AA	165	207	1
			AG	118	96	0.63	0.45 - 0.89	0.00909903
			GG	30	16	0.39	0.2 - 0.74	0.00500703
			AG or GG	148	112	0.58	0.42 - 0.81	0.00115988
			Trend			0.63	0.48 - 0.81	0.0004552
			Recessive			0.46	0.24 - 0.87	0.0189836
		CDKAL1 rs6456382
			AA	146	150	1
			AG	136	136	1	0.71 - 1.4	0.980916
			GG	34	34	1.02	0.59 - 1.74	0.956102
			AG or GG	170	170	1	0.73 - 1.38	0.998702
			Trend			1	0.79 - 1.27	0.976728
			Recessive			1.02	0.61 - 1.7	0.947915
		CDKAL1 rs9358377
			AA	108	110	1
			AC	157	155	0.96	0.67 - 1.36	0.806648
			CC	51	55	1.1	0.68 - 1.77	0.691878
			AC or CC	208	210	0.99	0.71 - 1.39	0.959917
			Trend			1.03	0.82 - 1.3	0.790945
			Recessive			1.13	0.74 - 1.74	0.576864
		CDKAL1 rs4710958
			GG	165	172	1
			GA	126	126	0.93	0.67 - 1.3	0.6685
			AA	25	23	0.78	0.42 - 1.46	0.442651
			GA or AA	151	149	0.91	0.66 - 1.24	0.53874
			Trend			0.91	0.7 - 1.16	0.439001
			Recessive			0.81	0.44 - 1.48	0.491848
		CDKAL1 rs72834308
			GG	187	167	1
			GA	106	127	1.35	0.96 - 1.9	0.0824141
			AA	23	27	1.41	0.77 - 2.6	0.26655
			GA or AA	129	154	1.36	0.99 - 1.88	0.0593054
			Trend			1.25	0.98 - 1.61	0.0751877
			Recessive			1.25	0.69 - 2.27	0.455041
		CDKAL1 rs7765765
			GG	183	166	1
			GA	111	129	1.3	0.93 - 1.82	0.130465
			AA	22	26	1.4	0.76 - 2.61	0.284238
			GA or AA	133	155	1.31	0.95 - 1.81	0.0940706
			Trend			1.23	0.96 - 1.59	0.103515
			Recessive			1.26	0.69 - 2.32	0.449683
		CDKAL1 rs72657619
			AA	171	174	1
			AG	121	124	0.99	0.71 - 1.38	0.948595
			GG	24	23	0.85	0.45 - 1.58	0.601917
			AG or GG	145	147	0.96	0.7 - 1.33	0.82529
			Trend			0.95	0.74 - 1.22	0.695925
			Recessive			0.85	0.46 - 1.56	0.602772
		CDKAL1 rs12196595
			GG	247	265	1
			GA	64	52	0.79	0.52 - 1.2	0.275686
			AA	5	3	0.49	0.09 - 2.12	0.34567
			GA or AA	69	55	0.77	0.51 - 1.15	0.205423
			Trend			0.77	0.53 - 1.11	0.167255
			Recessive			0.51	0.1 - 2.2	0.372872
		CDKAL1 rs1004172
			GG	174	172	1
			GA	119	129	1.06	0.76 - 1.48	0.745455
			AA	23	20	0.82	0.43 - 1.57	0.554517
			GA or AA	142	149	1.02	0.74 - 1.4	0.911324
			Trend			0.98	0.76 - 1.26	0.853456
			Recessive			0.8	0.42 - 1.51	0.498838
		CDKAL1 rs4712573
			AA	119	130	1
			AC	144	145	0.93	0.66 - 1.31	0.671671
			CC	53	45	0.75	0.46 - 1.2	0.229346
			AC or CC	197	190	0.88	0.63 - 1.22	0.432873
			Trend			0.88	0.7 - 1.1	0.259102
			Recessive			0.78	0.5 - 1.2	0.260188
		CDKAL1 rs1980458
			AA	245	260	1
			AG	66	57	0.86	0.58 - 1.29	0.475697
			GG	5	4	0.7	0.16 - 2.79	0.607128
			AG or GG	71	61	0.85	0.57 - 1.26	0.421001
			Trend			0.86	0.6 - 1.22	0.39332
			Recessive			0.72	0.17 - 2.86	0.634307
		CDKAL1 rs6456389
			CC	108	102	1
			CA	152	167	1.15	0.8 - 1.64	0.447143
			AA	56	52	0.95	0.59 - 1.52	0.818975
			CA or AA	208	219	1.09	0.78 - 1.53	0.604855
			Trend			1	0.79 - 1.26	0.995403
			Recessive			0.87	0.57 - 1.33	0.522644
		CDKAL1 rs9358383
			AA	173	176	1
			AG	115	123	1.01	0.72 - 1.41	0.975204
			GG	28	22	0.74	0.4 - 1.35	0.329689
			AG or GG	143	145	0.95	0.69 - 1.31	0.768205
			Trend			0.92	0.72 - 1.18	0.510636
			Recessive			0.74	0.4 - 1.33	0.313366
		CDKAL1 rs6932393
			GG	230	251	1
			GA	77	67	0.86	0.59 - 1.27	0.45578
			AA	9	3	0.26	0.05 - 0.91	0.0496599
			GA or AA	86	70	0.79	0.55 - 1.15	0.218955
			Trend			0.75	0.54 - 1.05	0.096219
			Recessive			0.26	0.06 - 0.93	0.0544216
		CDKAL1 rs2494728
			TT	225	250	1
			TA	79	67	0.82	0.56 - 1.2	0.305185
			AA	12	4	0.28	0.08 - 0.84	0.0331544
			TA or AA	91	71	0.74	0.52 - 1.07	0.113602
			Trend			0.72	0.52 - 0.99	0.0413433
			Recessive			0.29	0.08 - 0.87	0.0393166
		CDKAL1 rs12192642
			GG	230	234	1
			GA	78	81	0.94	0.65 - 1.37	0.760145
			AA	7	6	0.82	0.25 - 2.58	0.728345
			GA or AA	85	87	0.93	0.65 - 1.34	0.708731
			Trend			0.93	0.68 - 1.29	0.670341
			Recessive			0.83	0.26 - 2.61	0.746027
		CDKAL1 rs6905258
			GG	235	254	1
			GA	71	63	0.83	0.56 - 1.23	0.357116
			AA	10	4	0.35	0.09 - 1.09	0.0865547
			GA or AA	81	67	0.77	0.53 - 1.12	0.176974
			Trend			0.75	0.54 - 1.04	0.0906439
			Recessive			0.36	0.09 - 1.13	0.0976778
		CDKAL1 rs10946425
			GG	186	184	1
			GA	118	123	1.02	0.73 - 1.43	0.892784
			AA	12	13	1.19	0.52 - 2.74	0.685724
			GA or AA	130	136	1.04	0.75 - 1.43	0.821595
			Trend			1.05	0.79 - 1.38	0.743962
			Recessive			1.18	0.52 - 2.69	0.697679
		CDKAL1 rs76376935
			GG	188	186	1
			GA	113	115	1.03	0.74 - 1.44	0.854617
			AA	15	20	1.38	0.68 - 2.86	0.371786
			GA or AA	128	135	1.07	0.78 - 1.48	0.669398
			Trend			1.1	0.84 - 1.43	0.493422
			Recessive			1.37	0.68 - 2.8	0.38188
		CDKAL1 rs12526927
			AA	198	195	1
			AC	109	114	1.03	0.73 - 1.44	0.871869
			CC	9	12	1.46	0.59 - 3.69	0.412691
			AC or CC	118	126	1.06	0.76 - 1.47	0.726146
			Trend			1.09	0.82 - 1.45	0.571279
			Recessive			1.44	0.59 - 3.63	0.420848
		CDKAL1 rs415446
			AA	145	145	1
			AG	136	149	1.11	0.8 - 1.56	0.533837
			GG	35	27	0.73	0.41 - 1.28	0.276118
			AG or GG	171	176	1.03	0.75 - 1.42	0.849687
			Trend			0.94	0.74 - 1.21	0.644166
			Recessive			0.69	0.4 - 1.19	0.184019
		CDKAL1 rs13210277
			GG	254	274	1
			GA	57	43	0.68	0.44 - 1.05	0.0854486
			AA	5	4	0.79	0.18 - 3.21	0.737552
			GA or AA	62	47	0.69	0.45 - 1.05	0.0842512
			Trend			0.73	0.49 - 1.07	0.107084
			Recessive			0.84	0.19 - 3.41	0.805015
		CDKAL1 rs989969
			CC	154	159	1
			CA	136	131	0.91	0.65 - 1.27	0.573005
			AA	26	31	1.25	0.7 - 2.24	0.452885
			CA or AA	162	162	0.96	0.7 - 1.32	0.804147
			Trend			1.03	0.8 - 1.31	0.826149
			Recessive			1.3	0.75 - 2.29	0.351157
		CDKAL1 rs201312
			AA	102	115	1
			AG	162	143	0.74	0.52 - 1.06	0.105068
			GG	52	62	1.06	0.66 - 1.68	0.821137
			AG or GG	214	205	0.82	0.59 - 1.14	0.243146
			Trend			0.98	0.78 - 1.22	0.834232
			Recessive			1.25	0.83 - 1.9	0.288895
		CDKAL1 rs9350314
			AA	167	162	1
			AG	126	132	1.09	0.78 - 1.53	0.597117
			GG	23	24	1.15	0.61 - 2.15	0.667151
			AG or GG	149	156	1.1	0.8 - 1.52	0.549673
			Trend			1.08	0.84 - 1.39	0.54413
			Recessive			1.1	0.6 - 2.03	0.752229
		CDKAL1 rs201327
			GG	229	219	1
			GA	78	92	1.26	0.88 - 1.81	0.215898
			AA	9	10	1.09	0.42 - 2.85	0.853785
			GA or AA	87	102	1.24	0.87 - 1.76	0.227884
			Trend			1.18	0.87 - 1.6	0.290275
			Recessive			1.02	0.4 - 2.65	0.960699
		CDKAL1 rs1001310
			AA	97	110	1
			AG	159	150	0.82	0.57 - 1.17	0.274253
			GG	60	61	0.92	0.58 - 1.45	0.703941
			AG or GG	219	211	0.84	0.6 - 1.18	0.327654
			Trend			0.94	0.75 - 1.17	0.569915
			Recessive			1.03	0.69 - 1.55	0.881593
		CDKAL1 rs2068072
			CC	160	154	1
			CA	122	130	1.12	0.8 - 1.57	0.517679
			AA	34	36	1.1	0.65 - 1.88	0.719342
			CA or AA	156	166	1.11	0.81 - 1.53	0.50275
			Trend			1.07	0.85 - 1.36	0.561337
			Recessive			1.05	0.63 - 1.75	0.855082
		CDKAL1 rs9366375
			AA	149	141	1
			AG	134	138	1.03	0.74 - 1.45	0.855911
			GG	30	41	1.41	0.83 - 2.42	0.206437
			AG or GG	164	179	1.1	0.8 - 1.52	0.55459
			Trend			1.13	0.89 - 1.44	0.300482
			Recessive			1.39	0.84 - 2.33	0.204755
		CDKAL1 rs6904348
			CC	168	167	1
			CA	122	132	1.09	0.78 - 1.53	0.595972
			AA	26	22	0.85	0.45 - 1.57	0.600767
			CA or AA	148	154	1.05	0.76 - 1.44	0.761897
			Trend			1	0.77 - 1.28	0.968934
			Recessive			0.82	0.44 - 1.49	0.507154
		CDKAL1 rs77373471
			TT	79	88	1
			TA	161	159	0.87	0.59 - 1.27	0.460793
			AA	76	74	0.87	0.55 - 1.36	0.543929
			TA or AA	237	233	0.87	0.6 - 1.24	0.438674
			Trend			0.93	0.74 - 1.17	0.530784
			Recessive			0.96	0.66 - 1.39	0.812413
		CDKAL1 rs79034658
			AA	220	197	1
			AG	86	115	1.5	1.06 - 2.12	0.0221297
			GG	10	9	1	0.39 - 2.57	0.991785
			AG or GG	96	124	1.45	1.03 - 2.02	0.0311309
			Trend			1.31	0.98 - 1.76	0.071916
			Recessive			0.88	0.34 - 2.24	0.787611
		CDKAL1 rs9350319
			AA	167	161	1
			AG	128	124	0.96	0.69 - 1.34	0.812557
			GG	21	35	1.64	0.91 - 3.01	0.104109
			AG or GG	149	159	1.06	0.77 - 1.45	0.736366
			Trend			1.14	0.89 - 1.45	0.306758
			Recessive			1.67	0.94 - 3.01	0.0826163
		CDKAL1 rs4712585
			AA	263	282	1
			AG	51	36	0.65	0.4 - 1.04	0.0723481
			GG	1	1	1.11	0.04 - 28.4	0.941262
			AG or GG	52	37	0.66	0.41 - 1.04	0.0777386
			Trend			0.68	0.43 - 1.06	0.0923093
			Recessive			1.2	0.05 - 30.72	0.898024
		CDKAL1 rs6456397
			AA	170	159	1
			AG	119	135	1.26	0.9 - 1.76	0.18117
			GG	27	27	1.13	0.62 - 2.04	0.690351
			AG or GG	146	162	1.23	0.9 - 1.7	0.196862
			Trend			1.14	0.89 - 1.46	0.303272
			Recessive			1.02	0.58 - 1.81	0.947884
		CDKAL1 rs62404499
			GG	311	314	1
			GA	5	7	1.5	0.47 - 5.2	0.498284
			GA or AA	5	7	1.5	0.47 - 5.2	0.498284
			Trend			1.5	0.47 - 5.2	0.498284
			Recessive					0.186887
		CDKAL1 rs10946430
			GG	134	136	1
			GA	143	141	0.94	0.67 - 1.32	0.735469
			AA	39	44	1.05	0.63 - 1.75	0.843818
			GA or AA	182	185	0.97	0.7 - 1.33	0.834496
			Trend			1	0.79 - 1.26	0.989487
			Recessive			1.08	0.68 - 1.75	0.737703
		CDKAL1 rs6937439
			AA	120	144	1
			AG	153	132	0.75	0.53 - 1.05	0.0930251
			GG	43	45	0.86	0.52 - 1.4	0.538565
			AG or GG	196	177	0.77	0.56 - 1.06	0.113009
			Trend			0.88	0.69 - 1.1	0.255934
			Recessive			1	0.63 - 1.58	0.9927
		CDKAL1 rs9295494
			AA	117	137	1
			AG	154	137	0.79	0.56 - 1.11	0.17663
			GG	45	46	0.86	0.53 - 1.41	0.555582
			AG or GG	199	183	0.81	0.58 - 1.11	0.192552
			Trend			0.89	0.71 - 1.12	0.333042
			Recessive			0.98	0.62 - 1.54	0.931116
		CDKAL1 rs10498701
			GG	302	313	1
			GA	14	8	0.55	0.21 - 1.33	0.197225
			GA or AA	14	8	0.55	0.21 - 1.33	0.197225
			Trend			0.55	0.21 - 1.33	0.197225
			Recessive					0.186887
		CDKAL1 rs1466340
			AA	265	277	1
			AC	50	40	0.74	0.47 - 1.17	0.19424
			CC	1	2	1.84	0.17 - 40.42	0.624445
			AC or CC	51	42	0.76	0.48 - 1.19	0.23299
			Trend			0.8	0.52 - 1.22	0.299778
			Recessive			1.93	0.18 - 42.37	0.598258
		CDKAL1 rs9368283
			GG	174	178	1
			GA	122	119	0.95	0.68 - 1.32	0.748559
			AA	20	24	1.24	0.65 - 2.36	0.513487
			GA or AA	142	143	0.99	0.72 - 1.36	0.936426
			Trend			1.03	0.8 - 1.33	0.811092
			Recessive			1.26	0.68 - 2.38	0.460098
		CDKAL1 rs9356770
			GG	190	189	1
			GA	111	111	1.03	0.73 - 1.44	0.88129
			AA	15	21	1.44	0.72 - 2.95	0.310944
			GA or AA	126	132	1.08	0.78 - 1.49	0.657636
			Trend			1.11	0.85 - 1.44	0.453692
			Recessive			1.42	0.72 - 2.89	0.315998
		CDKAL1 rs11965768
			TT	251	271	1
			TA	63	46	0.67	0.44 - 1.02	0.0657309
			AA	1	4	3.26	0.44 - 66.29	0.307051
			TA or AA	64	50	0.71	0.47 - 1.08	0.109457
			Trend			0.78	0.53 - 1.15	0.204946
			Recessive			3.48	0.47 - 70.76	0.280229
		CDKAL1 rs12526391
			GG	279	286	1
			GA	36	35	0.92	0.55 - 1.52	0.737031
			AA	1	0	0	-3.18956e+41	0.979819
			GA or AA	37	35	0.89	0.54 - 1.48	0.653641
			Trend			0.87	0.53 - 1.42	0.574666
			Recessive			0	-3.21284e+41	0.979829
		CDKAL1 rs9465982
			AA	153	150	1
			AG	121	133	1.16	0.83 - 1.64	0.387925
			GG	34	31	0.89	0.51 - 1.54	0.683041
			AG or GG	155	164	1.1	0.8 - 1.52	0.556627
			Trend			1.02	0.8 - 1.29	0.900203
			Recessive			0.83	0.49 - 1.41	0.493682
		CDKAL1 rs9295501
			AA	247	261	1
			AG	54	51	0.91	0.59 - 1.4	0.671389
			GG	6	3	0.46	0.09 - 1.8	0.282426
			AG or GG	60	54	0.87	0.57 - 1.31	0.493022
			Trend			0.84	0.58 - 1.22	0.363607
			Recessive			0.47	0.1 - 1.83	0.291744
		CDKAL1 rs9465985
			AA	174	176	1
			AG	116	122	1.07	0.77 - 1.51	0.675001
			GG	25	22	0.82	0.44 - 1.53	0.530746
			AG or GG	141	144	1.03	0.75 - 1.42	0.866622
			Trend			0.98	0.76 - 1.26	0.862356
			Recessive			0.8	0.43 - 1.46	0.461586
		CDKAL1 rs9465989
			GG	289	286	1
			GA	27	34	1.25	0.73 - 2.17	0.41069
			AA	0	1	805486	0 -	0.979736
			GA or AA	27	35	1.29	0.76 - 2.23	0.346426
			Trend			1.32	0.79 - 2.26	0.293878
			Recessive			791401	0 -	0.979763
		CDKAL1 rs35013686
			GG	227	214	1
			GA	82	93	1.25	0.87 - 1.79	0.223033
			AA	7	13	1.99	0.78 - 5.47	0.159391
			GA or AA	89	106	1.31	0.93 - 1.85	0.125424
			Trend			1.3	0.97 - 1.76	0.0819618
			Recessive			1.87	0.74 - 5.13	0.196404
		CDKAL1 rs16884616
			GG	176	177	1
			GA	114	121	1.08	0.77 - 1.52	0.643992
			AA	26	23	0.83	0.44 - 1.52	0.539371
			GA or AA	140	144	1.03	0.75 - 1.42	0.839756
			Trend			0.98	0.76 - 1.26	0.880766
			Recessive			0.8	0.44 - 1.45	0.462927
		CDKAL1 rs9465991
			AA	203	208	1
			AG	96	98	1.02	0.72 - 1.44	0.925438
			GG	16	15	0.9	0.42 - 1.9	0.772631
			AG or GG	112	113	1	0.72 - 1.39	0.99642
			Trend			0.98	0.75 - 1.29	0.906741
			Recessive			0.89	0.42 - 1.87	0.759282
		CDKAL1 rs1531303
			TT	292	295	1
			TA	24	26	1.01	0.56 - 1.82	0.985748
			TA or AA	24	26	1.01	0.56 - 1.82	0.985748
			Trend			1.01	0.56 - 1.82	0.985748
			Recessive					0.186887
		CDKAL1 rs10456242
			AA	201	206	1
			AG	98	100	1.02	0.72 - 1.44	0.928902
			GG	17	15	0.83	0.39 - 1.74	0.625751
			AG or GG	115	115	0.99	0.71 - 1.37	0.943928
			Trend			0.97	0.74 - 1.27	0.80478
			Recessive			0.83	0.4 - 1.72	0.611818
		CDKAL1 rs898167
			CC	234	237	1
			CA	45	39	0.86	0.53 - 1.38	0.539172
			AA	22	20	0.87	0.45 - 1.65	0.662334
			CA or AA	67	59	0.86	0.58 - 1.29	0.473517
			Trend			0.91	0.69 - 1.2	0.509037
			Recessive			0.89	0.46 - 1.68	0.711455
		CDKAL1 rs898165
			GG	188	175	1
			GA	113	121	1.22	0.87 - 1.7	0.255749
			AA	15	25	1.87	0.95 - 3.8	0.0734834
			GA or AA	128	146	1.29	0.94 - 1.78	0.118664
			Trend			1.29	0.99 - 1.68	0.0577927
			Recessive			1.73	0.89 - 3.47	0.109706
		CDKAL1 rs12664336
			GG	196	203	1
			GA	103	105	0.99	0.7 - 1.39	0.950851
			AA	17	13	0.74	0.34 - 1.57	0.428556
			GA or AA	120	118	0.95	0.69 - 1.32	0.772477
			Trend			0.93	0.71 - 1.22	0.595545
			Recessive			0.74	0.34 - 1.56	0.428558
		CDKAL1 rs12201217
			GG	187	197	1
			GA	111	110	0.93	0.66 - 1.3	0.670534
			AA	18	14	0.76	0.36 - 1.59	0.471195
			GA or AA	129	124	0.91	0.65 - 1.25	0.550792
			Trend			0.9	0.69 - 1.18	0.459805
			Recessive			0.78	0.37 - 1.62	0.509914
		CDKAL1 rs62404549
			AA	307	313	1
			AC	9	8	0.86	0.31 - 2.36	0.773503
			AC or CC	9	8	0.86	0.31 - 2.36	0.773503
			Trend			0.86	0.31 - 2.36	0.773503
			Recessive					0.186887
		CDKAL1 rs9358401
			AA	82	98	1
			AG	176	162	0.75	0.52 - 1.09	0.130292
			GG	58	60	0.85	0.53 - 1.36	0.495154
			AG or GG	234	222	0.78	0.54 - 1.1	0.15745
			Trend			0.9	0.71 - 1.14	0.376224
			Recessive			1.02	0.68 - 1.54	0.920478
		CDKAL1 rs1563726
			GG	281	281	1
			GA	35	37	1.05	0.64 - 1.73	0.856369
			AA	0	2	1430277	0 -	0.981884
			GA or AA	35	39	1.09	0.67 - 1.8	0.724862
			Trend			1.14	0.71 - 1.84	0.596221
			Recessive			1.42163e+06	0 -	0.981892
		CDKAL1 rs2328574
			GG	80	87	1
			GA	172	158	0.86	0.59 - 1.25	0.427108
			AA	64	76	1.13	0.71 - 1.79	0.608049
			GA or AA	236	234	0.93	0.65 - 1.33	0.694228
			Trend			1.05	0.84 - 1.32	0.66462
			Recessive			1.25	0.85 - 1.84	0.254532
		CDKAL1 rs9466002
			AA	273	274	1
			AG	43	42	0.97	0.61 - 1.54	0.893646
			GG	0	3	1.40376e+06	0 -	0.977841
			AG or GG	43	45	1.03	0.65 - 1.62	0.913818
			Trend			1.08	0.7 - 1.69	0.716169
			Recessive			1.40931e+06	0 -	0.977834
		CDKAL1 rs9466004
			GG	281	282	1
			GA	35	37	1.04	0.63 - 1.72	0.866892
			AA	0	2	1.41331e+06	0 -	0.981899
			GA or AA	35	39	1.09	0.66 - 1.79	0.735552
			Trend			1.13	0.71 - 1.83	0.606597
			Recessive			1.40544e+06	0 -	0.981907
		CDKAL1 rs7770752
			CC	271	272	1
			CA	45	45	0.99	0.63 - 1.57	0.977041
			AA	0	3	1.39699e+06	0 -	0.977848
			CA or AA	45	48	1.05	0.67 - 1.64	0.83738
			Trend			1.1	0.72 - 1.7	0.652689
			Recessive			1.39815e+06	0 -	0.977847
		CDKAL1 rs1137970
			AA	109	115	1
			AG	158	150	0.93	0.65 - 1.32	0.665619
			GG	49	56	1.01	0.63 - 1.62	0.971488
			AG or GG	207	206	0.95	0.68 - 1.32	0.742487
			Trend			0.99	0.79 - 1.24	0.923469
			Recessive			1.05	0.69 - 1.62	0.807098
		GCK rs2268576
			GG	135	121	1
			GA	130	154	1.35	0.95 - 1.91	0.0935481
			AA	49	43	0.96	0.59 - 1.56	0.864815
			GA or AA	179	197	1.24	0.89 - 1.71	0.200513
			Trend			1.06	0.84 - 1.33	0.645364
			Recessive			0.82	0.52 - 1.29	0.387167
		GCK rs12534623
			AA	109	124	1
			AG	154	156	0.93	0.66 - 1.32	0.690321
			GG	53	41	0.73	0.44 - 1.19	0.206088
			AG or GG	207	197	0.88	0.63 - 1.22	0.449183
			Trend			0.87	0.69 - 1.1	0.245272
			Recessive			0.76	0.48 - 1.19	0.227828
		GCK rs2908297
			GG	182	170	1
			GA	113	132	1.17	0.84 - 1.64	0.356808
			AA	20	19	1.04	0.53 - 2.04	0.916264
			GA or AA	133	151	1.15	0.84 - 1.59	0.390386
			Trend			1.09	0.84 - 1.42	0.505595
			Recessive			0.97	0.5 - 1.89	0.934531
		GCK rs2080033
			AA	153	147	1
			AG	134	142	1.14	0.82 - 1.6	0.429396
			GG	29	32	1.09	0.62 - 1.91	0.774972
			AG or GG	163	174	1.13	0.82 - 1.56	0.440627
			Trend			1.08	0.85 - 1.38	0.5371
			Recessive			1.02	0.59 - 1.75	0.949185
		GCK rs76029286
			AA	175	166	1
			AG	116	133	1.14	0.82 - 1.59	0.440438
			GG	25	21	0.86	0.45 - 1.61	0.630461
			AG or GG	141	154	1.09	0.79 - 1.5	0.594191
			Trend			1.02	0.79 - 1.31	0.885383
			Recessive			0.81	0.44 - 1.49	0.50184
		GCK rs12535229
			GG	174	189	1
			GA	116	116	0.94	0.67 - 1.32	0.735877
			AA	26	15	0.57	0.28 - 1.1	0.0995074
			GA or AA	142	131	0.87	0.63 - 1.21	0.413027
			Trend			0.84	0.65 - 1.09	0.191129
			Recessive			0.58	0.29 - 1.11	0.106887
		GCK rs2971671
			AA	223	223	1
			AG	89	88	1.03	0.72 - 1.47	0.88576
			GG	4	8	2.11	0.63 - 8.2	0.241017
			AG or GG	93	96	1.07	0.76 - 1.52	0.696881
			Trend			1.11	0.81 - 1.53	0.501545
			Recessive			2.09	0.63 - 8.11	0.244182
		GCK rs2908290
			GG	103	89	1
			GA	154	176	1.3	0.9 - 1.87	0.160972
			AA	59	56	1.06	0.66 - 1.71	0.795218
			GA or AA	213	232	1.23	0.87 - 1.74	0.236389
			Trend			1.06	0.84 - 1.34	0.599395
			Recessive			0.9	0.6 - 1.37	0.630595
		GCK rs2300586
			GG	164	153	1
			GA	123	140	1.15	0.82 - 1.61	0.40668
			AA	29	28	1.01	0.57 - 1.79	0.981246
			GA or AA	152	168	1.12	0.82 - 1.55	0.469144
			Trend			1.06	0.83 - 1.35	0.640451
			Recessive			0.94	0.54 - 1.65	0.839392
		GCK rs758986
			GG	195	192	1
			GC	103	114	1.07	0.76 - 1.5	0.711705
			CC	16	11	0.7	0.3 - 1.55	0.381025
			GC or CC	119	125	1.02	0.73 - 1.41	0.922344
			Trend			0.96	0.73 - 1.27	0.800234
			Recessive			0.68	0.3 - 1.5	0.346374
		GCK rs59727929
			GG	224	256	1
			GA	83	59	0.59	0.4 - 0.86	0.00740167
			AA	9	6	0.67	0.22 - 1.93	0.464707
			GA or AA	92	65	0.59	0.41 - 0.86	0.00653522
			Trend			0.65	0.47 - 0.91	0.0116895
			Recessive			0.75	0.25 - 2.16	0.602782
		GCK rs3808320
			GG	289	283	1
			GA	27	38	1.5	0.89 - 2.57	0.134668
			GA or AA	27	38	1.5	0.89 - 2.57	0.134668
			Trend			1.5	0.89 - 2.57	0.134668
			Recessive					0.186887
		GCK rs2268569
			CC	222	222	1
			CA	88	96	1.07	0.75 - 1.52	0.698101
			AA	6	3	0.48	0.1 - 1.89	0.313796
			CA or AA	94	99	1.03	0.73 - 1.46	0.847319
			Trend			0.99	0.72 - 1.36	0.939899
			Recessive			0.47	0.1 - 1.84	0.298383
		GCK rs3757840
			AA	90	75	1
			AC	154	171	1.33	0.91 - 1.96	0.144026
			CC	72	75	1.27	0.81 - 2.01	0.296794
			AC or CC	226	246	1.31	0.91 - 1.89	0.141382
			Trend			1.13	0.9 - 1.42	0.276605
			Recessive			1.05	0.72 - 1.54	0.781346
		GCK rs2971669
			GG	126	136	1
			GA	144	146	0.94	0.67 - 1.32	0.708489
			AA	46	39	0.76	0.46 - 1.25	0.285985
			GA or AA	190	185	0.89	0.65 - 1.23	0.495717
			Trend			0.89	0.7 - 1.12	0.323256
			Recessive			0.79	0.49 - 1.26	0.317561
		TCF7L2 rs7094463
			AA	113	96	1
			AG	146	167	1.26	0.88 - 1.8	0.216011
			GG	57	58	1.16	0.73 - 1.85	0.530972
			AG or GG	203	225	1.23	0.87 - 1.73	0.234947
			Trend			1.1	0.88 - 1.38	0.404719
			Recessive			1.01	0.67 - 1.54	0.946187
		TCF7L2 rs138820252
			GG	289	301	1
			GA	27	19	0.61	0.32 - 1.13	0.117561
			AA	0	1	404365	0 -	0.980763
			GA or AA	27	20	0.63	0.34 - 1.17	0.146277
			Trend			0.67	0.37 - 1.22	0.191126
			Recessive			417375	0 -	0.980716
		TCF7L2 rs61875105
			AA	304	310	1
			AG	11	10	0.8	0.32 - 1.98	0.632781
			GG	1	0	0	-1.00949e+41	0.978167
			AG or GG	12	10	0.7	0.28 - 1.7	0.43308
			Trend			0.64	0.27 - 1.47	0.29561
			Recessive			0	-1.01611e+41	0.978177
		TCF7L2 rs2296782
			GG	182	201	1
			GA	117	107	0.82	0.59 - 1.15	0.259618
			AA	17	13	0.67	0.31 - 1.44	0.311329
			GA or AA	134	120	0.8	0.58 - 1.11	0.187757
			Trend			0.82	0.63 - 1.08	0.158995
			Recessive			0.72	0.33 - 1.53	0.398414
		TCF7L2 rs11196172
			AA	141	164	1
			AG	140	130	0.79	0.56 - 1.1	0.157611
			GG	35	27	0.6	0.34 - 1.06	0.0792303
			AG or GG	175	157	0.75	0.54 - 1.03	0.073955
			Trend			0.78	0.61 - 0.99	0.0453961
			Recessive			0.67	0.39 - 1.16	0.15578
		TCF7L2 rs7901275
			CC	163	178	1
			CA	129	130	0.93	0.67 - 1.29	0.643721
			AA	24	13	0.52	0.25 - 1.05	0.0726124
			CA or AA	153	143	0.86	0.63 - 1.18	0.359267
			Trend			0.82	0.63 - 1.07	0.151439
			Recessive			0.53	0.26 - 1.07	0.0821536
		TCF7L2 rs58233689
			GG	306	308	1
			GC	9	12	1.15	0.46 - 2.92	0.767228
			CC	1	0	0	-1.01937e+41	0.978182
			GC or CC	10	12	0.99	0.41 - 2.44	0.97936
			Trend			0.87	0.38 - 2.03	0.737369
			Recessive			0	-1.01449e+41	0.978174
		TCF7L2 rs72826065
			AA	154	162	1
			AG	133	136	0.96	0.69 - 1.33	0.794861
			GG	29	23	0.73	0.39 - 1.33	0.299227
			AG or GG	162	159	0.92	0.67 - 1.26	0.585484
			Trend			0.9	0.7 - 1.15	0.389869
			Recessive			0.74	0.41 - 1.33	0.314861
		TCF7L2 rs114204952
			AA	296	300	1
			AG	20	21	1.01	0.53 - 1.94	0.970232
			AG or GG	20	21	1.01	0.53 - 1.94	0.970232
			Trend			1.01	0.53 - 1.94	0.970232
			Recessive					0.186887
		TCF7L2 rs6585196
			AA	182	190	1
			AG	115	120	1.02	0.73 - 1.42	0.918254
			GG	19	10	0.5	0.22 - 1.1	0.0926089
			AG or GG	134	130	0.94	0.68 - 1.3	0.719236
			Trend			0.88	0.67 - 1.15	0.352691
			Recessive			0.5	0.22 - 1.08	0.0854874
		TCF7L2 rs7092484
			GG	295	303	1
			GA	20	18	0.87	0.44 - 1.7	0.686247
			AA	1	0	0	-3.03236e+41	0.979739
			GA or AA	21	18	0.83	0.42 - 1.61	0.579696
			Trend			0.8	0.41 - 1.51	0.487108
			Recessive			0	-3.06892e+41	0.979757
		TCF7L2 rs4132670
			GG	305	312	1
			GA	10	9	0.84	0.32 - 2.14	0.705805
			AA	1	0	0	-1.93043e+41	0.979075
			GA or AA	11	9	0.74	0.29 - 1.85	0.523047
			Trend			0.69	0.28 - 1.62	0.392107
			Recessive			0	-1.9456e+41	0.979086
		TCF7L2 rs6585201
			GG	289	294	1
			GA	19	22	1.05	0.55 - 2.02	0.890124
			AA	1	0	0	-2.02866e+41	0.97915
			GA or AA	20	22	0.99	0.52 - 1.88	0.96469
			Trend			0.93	0.5 - 1.74	0.816161
			Recessive			0	-2.02189e+41	0.979144
		TCF7L2 rs7904519
			AA	292	295	1
			AG	23	24	0.92	0.5 - 1.7	0.792533
			GG	1	1	0.68	0.03 - 17.58	0.789251
			AG or GG	24	25	0.91	0.5 - 1.66	0.757501
			Trend			0.91	0.51 - 1.6	0.731351
			Recessive			0.69	0.03 - 17.7	0.793033
		TCF7L2 rs55972445
			CC	308	313	1
			CA	8	8	0.9	0.32 - 2.52	0.838054
			CA or AA	8	8	0.9	0.32 - 2.52	0.838054
			Trend			0.9	0.32 - 2.52	0.838054
			Recessive					0.186887
		TCF7L2 rs12243326
			AA	307	311	1
			AG	8	10	1.25	0.48 - 3.36	0.650873
			GG	1	0	0	-1.96096e+41	0.979098
			AG or GG	9	10	1.08	0.42 - 2.8	0.870632
			Trend			0.95	0.39 - 2.3	0.906187
			Recessive			0	-1.9456e+41	0.979086
		TCF7L2 rs7919152
			GG	297	299	1
			GA	18	22	1.12	0.58 - 2.18	0.741089
			AA	1	0	0	-1.96171e+41	0.979099
			GA or AA	19	22	1.05	0.55 - 2.02	0.888276
			Trend			0.98	0.52 - 1.85	0.952739
			Recessive			0	-1.9456e+41	0.979086
		TCF7L2 rs7076754
			GG	306	310	1
			GA	10	11	0.94	0.38 - 2.33	0.886384
			GA or AA	10	11	0.94	0.38 - 2.33	0.886384
			Trend			0.94	0.38 - 2.33	0.886384
			Recessive					0.186887
		TCF7L2 rs12265291
			AA	292	298	1
			AG	22	21	0.85	0.45 - 1.6	0.612011
			GG	1	1	0.67	0.03 - 17.16	0.776454
			AG or GG	23	22	0.84	0.45 - 1.56	0.580617
			Trend			0.84	0.47 - 1.51	0.56541
			Recessive			0.68	0.03 - 17.37	0.783084
		TCF7L2 rs11196212
			AA	283	287	1
			AG	32	32	0.92	0.54 - 1.56	0.748729
			GG	1	2	1.28	0.12 - 27.8	0.843148
			AG or GG	33	34	0.93	0.55 - 1.56	0.783697
			Trend			0.95	0.58 - 1.55	0.830053
			Recessive			1.29	0.12 - 28.1	0.835861
		TCF7L2 rs7919409
			AA	201	195	1
			AG	96	115	1.16	0.82 - 1.64	0.389879
			GG	19	11	0.49	0.22 - 1.07	0.0808928
			AG or GG	115	126	1.05	0.75 - 1.46	0.77982
			Trend			0.94	0.71 - 1.23	0.634684
			Recessive			0.47	0.21 - 1.01	0.0570358
		TCF7L2 rs3750804
			GG	167	180	1
			GA	132	116	0.78	0.56 - 1.1	0.156718
			AA	17	25	1.26	0.65 - 2.48	0.501855
			GA or AA	149	141	0.84	0.61 - 1.16	0.285159
			Trend			0.94	0.73 - 1.22	0.648054
			Recessive			1.39	0.73 - 2.71	0.31725
		TCF7L2 rs7908486
			GG	151	156	1
			GA	140	132	0.87	0.62 - 1.21	0.401151
			AA	25	33	1.21	0.68 - 2.16	0.525075
			GA or AA	165	165	0.92	0.67 - 1.26	0.599965
			Trend			1	0.78 - 1.28	0.998623
			Recessive			1.29	0.74 - 2.27	0.36579
		TCF7L2 rs4277044
			GG	292	289	1
			GA	23	32	1.39	0.79 - 2.49	0.256061
			AA	1	0	0	-4.03995e+41	0.980179
			GA or AA	24	32	1.34	0.76 - 2.38	0.310071
			Trend			1.27	0.74 - 2.22	0.386004
			Recessive			0	-3.91157e+41	0.98013
		TCF7L2 rs4918792
			GG	84	113	1
			GA	171	148	0.72	0.5 - 1.03	0.0756013
			AA	61	59	0.78	0.49 - 1.23	0.283875
			GA or AA	232	207	0.73	0.52 - 1.04	0.0791207
			Trend			0.86	0.68 - 1.08	0.195689
			Recessive			0.95	0.63 - 1.43	0.817741
		TCF7L2 rs966227
			AA	141	136	1
			AG	148	143	1	0.71 - 1.4	0.992327
			GG	26	42	1.59	0.92 - 2.79	0.101511
			AG or GG	174	185	1.09	0.79 - 1.5	0.609964
			Trend			1.16	0.91 - 1.48	0.230255
			Recessive			1.59	0.95 - 2.72	0.0838763
		TCF7L2 rs11196224
			GG	134	143	1
			GA	153	146	0.89	0.64 - 1.25	0.513914
			AA	29	31	0.96	0.54 - 1.71	0.900854
			GA or AA	182	177	0.91	0.66 - 1.25	0.546257
			Trend			0.95	0.74 - 1.21	0.668843
			Recessive			1.02	0.59 - 1.76	0.935865
		TCF7L2 rs72641339
			AA	83	78	1
			AC	171	172	1.07	0.73 - 1.57	0.74026
			CC	62	71	1.2	0.75 - 1.92	0.448165
			AC or CC	233	243	1.1	0.77 - 1.59	0.600942
			Trend			1.09	0.87 - 1.38	0.45374
			Recessive			1.15	0.78 - 1.7	0.489795
		TCF7L2 rs7085532
			GG	80	86	1
			GA	187	161	0.8	0.55 - 1.17	0.243998
			AA	49	74	1.37	0.85 - 2.22	0.202724
			GA or AA	236	235	0.92	0.64 - 1.32	0.641227
			Trend			1.13	0.89 - 1.44	0.309647
			Recessive			1.59	1.06 - 2.41	0.0254413
		TCF7L2 rs35010564
			AA	302	302	1
			AC	14	19	1.32	0.64 - 2.77	0.450316
			AC or CC	14	19	1.32	0.64 - 2.77	0.450316
			Trend			1.32	0.64 - 2.77	0.450316
			Recessive					0.186887
		TCF7L2 rs290475
			AA	171	199	1
			AG	118	103	0.78	0.56 - 1.1	0.16244
			GG	27	19	0.64	0.33 - 1.19	0.162101
			AG or GG	145	122	0.76	0.55 - 1.04	0.0906702
			Trend			0.79	0.61 - 1.02	0.0722877
			Recessive			0.7	0.37 - 1.29	0.256493
		TCF7L2 rs290474
			GG	190	210	1
			GA	114	105	0.84	0.6 - 1.17	0.301366
			AA	12	6	0.46	0.15 - 1.26	0.143654
			GA or AA	126	111	0.8	0.58 - 1.11	0.190181
			Trend			0.79	0.59 - 1.06	0.114575
			Recessive			0.49	0.17 - 1.33	0.176327
		TCF7L2 rs12772424
			TT	267	254	1
			TA	48	65	1.4	0.92 - 2.13	0.117135
			AA	1	2	2.1	0.17 - 48.3	0.565826
			TA or AA	49	67	1.41	0.93 - 2.14	0.104207
			Trend			1.4	0.94 - 2.1	0.0983881
			Recessive			1.97	0.16 - 45.37	0.600033
		TCF7L2 rs4917645
			GG	270	256	1
			GA	45	63	1.47	0.96 - 2.26	0.0785114
			AA	1	2	2.11	0.18 - 48.63	0.562512
			GA or AA	46	65	1.48	0.97 - 2.27	0.0693098
			Trend			1.47	0.98 - 2.22	0.0663834
			Recessive			1.97	0.16 - 45.37	0.600033
		TCF7L2 rs73360281
			AA	188	205	1
			AG	108	100	0.9	0.64 - 1.27	0.545269
			GG	20	16	0.7	0.35 - 1.42	0.328084
			AG or GG	128	116	0.87	0.62 - 1.2	0.394401
			Trend			0.87	0.67 - 1.13	0.301531
			Recessive			0.73	0.36 - 1.46	0.375077
		TCF7L2 rs1362943
			GG	271	263	1
			GA	44	55	1.28	0.82 - 2	0.272762
			AA	1	2	1.36	0.12 - 30.59	0.808499
			GA or AA	45	57	1.28	0.83 - 1.99	0.264392
			Trend			1.27	0.83 - 1.94	0.2684
			Recessive			1.31	0.12 - 29.37	0.833334
		TCF7L2 rs10885417
			CC	182	200	1
			CA	113	105	0.88	0.63 - 1.24	0.478913
			AA	20	16	0.71	0.35 - 1.43	0.340316
			CA or AA	133	121	0.86	0.62 - 1.19	0.353672
			Trend			0.86	0.66 - 1.13	0.280359
			Recessive			0.74	0.37 - 1.48	0.401238
		TCF7L2 rs3814573
			AA	147	156	1
			AG	137	133	0.97	0.7 - 1.36	0.875567
			GG	32	31	0.85	0.48 - 1.49	0.567243
			AG or GG	169	164	0.95	0.69 - 1.31	0.74885
			Trend			0.94	0.74 - 1.2	0.621844
			Recessive			0.86	0.5 - 1.47	0.582116
		TCF7L2 rs7912600
			AA	303	309	1
			AG	13	12	0.9	0.39 - 2.06	0.804942
			AG or GG	13	12	0.9	0.39 - 2.06	0.804942
			Trend			0.9	0.39 - 2.06	0.804942
			Recessive					0.186887
		TCF7L2 rs73362207
			AA	201	208	1
			AG	99	101	1.03	0.73 - 1.46	0.869607
			GG	16	12	0.78	0.35 - 1.71	0.536137
			AG or GG	115	113	1	0.71 - 1.39	0.977571
			Trend			0.96	0.73 - 1.27	0.795939
			Recessive			0.77	0.35 - 1.68	0.515257
		TCF7L2 rs290491
			TT	307	317	1
			TA	9	4	0.4	0.1 - 1.26	0.135562
			TA or AA	9	4	0.4	0.1 - 1.26	0.135562
			Trend			0.4	0.1 - 1.26	0.135562
			Recessive					0.186887
		TCF7L2 rs290487
			AA	120	124	1
			AG	148	141	0.98	0.7 - 1.4	0.931528
			GG	47	56	1.13	0.7 - 1.83	0.612351
			AG or GG	195	197	1.02	0.74 - 1.42	0.902965
			Trend			1.05	0.83 - 1.31	0.696294
			Recessive			1.14	0.74 - 1.77	0.556223
		TCF7L2 rs1555485
			GG	258	255	1
			GA	54	61	1.14	0.76 - 1.73	0.524618
			AA	4	4	1	0.23 - 4.39	0.99453
			GA or AA	58	65	1.13	0.76 - 1.7	0.539998
			Trend			1.11	0.77 - 1.6	0.582486
			Recessive			0.98	0.22 - 4.27	0.97759
		TCF7L2 rs1225404
			AA	254	251	1
			AG	54	65	1.21	0.8 - 1.82	0.370045
			GG	7	5	0.73	0.21 - 2.37	0.603626
			AG or GG	61	70	1.15	0.78 - 1.71	0.48078
			Trend			1.08	0.77 - 1.53	0.655149
			Recessive			0.7	0.2 - 2.28	0.56119
		KCNQ1 rs11824286
			GG	101	122	1
			GA	163	146	0.74	0.52 - 1.05	0.0889818
			AA	52	53	0.8	0.5 - 1.29	0.368307
			GA or AA	215	199	0.75	0.54 - 1.05	0.0956758
			Trend			0.86	0.69 - 1.09	0.214431
			Recessive			0.96	0.63 - 1.48	0.858946
		KCNQ1 rs800336
			AA	91	109	1
			AG	167	154	0.75	0.52 - 1.08	0.126236
			GG	56	58	0.82	0.51 - 1.31	0.406162
			AG or GG	223	212	0.77	0.54 - 1.09	0.137071
			Trend			0.88	0.7 - 1.11	0.287917
			Recessive			0.98	0.65 - 1.48	0.911311
		KCNQ1 rs3864884
			GG	105	97	1
			GA	157	169	1.2	0.84 - 1.72	0.32589
			AA	54	55	1.11	0.69 - 1.8	0.656858
			GA or AA	211	224	1.18	0.84 - 1.66	0.352592
			Trend			1.08	0.85 - 1.36	0.532141
			Recessive			1	0.65 - 1.52	0.987743
		KCNQ1 rs11604980
			GG	198	216	1
			GA	104	95	0.89	0.63 - 1.25	0.489086
			AA	13	9	0.58	0.23 - 1.39	0.226346
			GA or AA	117	104	0.85	0.61 - 1.18	0.33262
			Trend			0.84	0.63 - 1.12	0.226151
			Recessive			0.6	0.24 - 1.44	0.256253
		KCNQ1 rs3815064
			GG	117	116	1
			GA	153	162	1.12	0.79 - 1.58	0.522052
			AA	44	40	0.93	0.56 - 1.56	0.794147
			GA or AA	197	202	1.08	0.77 - 1.5	0.658076
			Trend			1	0.79 - 1.28	0.968977
			Recessive			0.88	0.55 - 1.4	0.580986
		KCNQ1 rs11523905
			AA	178	204	1
			AG	119	105	0.8	0.57 - 1.12	0.194303
			GG	18	10	0.47	0.2 - 1.04	0.0689569
			AG or GG	137	115	0.75	0.54 - 1.04	0.0880954
			Trend			0.75	0.57 - 0.99	0.0427442
			Recessive			0.51	0.22 - 1.12	0.0989841
		KCNQ1 rs12576239
			GG	240	228	1
			GA	70	88	1.33	0.92 - 1.93	0.127914
			AA	6	5	0.89	0.25 - 3.06	0.852823
			GA or AA	76	93	1.3	0.91 - 1.86	0.1561
			Trend			1.22	0.88 - 1.7	0.228822
			Recessive			0.83	0.23 - 2.83	0.761868
		KCNQ1 rs10832134
			AA	100	107	1
			AG	162	166	0.99	0.69 - 1.41	0.957714
			GG	54	46	0.8	0.49 - 1.31	0.381674
			AG or GG	216	212	0.94	0.67 - 1.32	0.733105
			Trend			0.91	0.72 - 1.16	0.454155
			Recessive			0.81	0.52 - 1.25	0.342439
		KCNQ1 rs1080015
			AA	100	106	1
			AG	162	170	1.03	0.72 - 1.47	0.881093
			GG	54	45	0.79	0.48 - 1.29	0.354218
			AG or GG	216	215	0.97	0.69 - 1.36	0.847887
			Trend			0.92	0.72 - 1.16	0.465252
			Recessive			0.78	0.5 - 1.21	0.268347
		KCNQ1 rs11023096
			GG	96	101	1
			GA	165	168	1.02	0.71 - 1.46	0.934491
			AA	55	51	0.9	0.55 - 1.46	0.674729
			GA or AA	220	219	0.99	0.7 - 1.39	0.938693
			Trend			0.96	0.76 - 1.22	0.736246
			Recessive			0.89	0.58 - 1.37	0.605338
		KCNQ1 rs4929992
			GG	163	152	1
			GA	128	130	1.11	0.8 - 1.56	0.52714
			AA	25	39	1.69	0.97 - 2.98	0.066037
			GA or AA	153	169	1.21	0.88 - 1.66	0.24058
			Trend			1.23	0.97 - 1.56	0.0944901
			Recessive			1.61	0.94 - 2.78	0.0832928
		KCNQ1 rs2011750
			AA	83	79	1
			AC	157	161	1.08	0.73 - 1.59	0.708493
			CC	76	81	1.08	0.69 - 1.7	0.726945
			AC or CC	233	242	1.08	0.75 - 1.55	0.683681
			Trend			1.04	0.83 - 1.3	0.725167
			Recessive			1.03	0.71 - 1.49	0.868937
		KCNQ1 rs7924915
			GG	264	258	1
			GA	47	61	1.39	0.91 - 2.13	0.132823
			AA	5	2	0.45	0.06 - 2.17	0.34687
			GA or AA	52	63	1.3	0.86 - 1.97	0.216773
			Trend			1.18	0.81 - 1.73	0.380517
			Recessive			0.42	0.06 - 2.05	0.314859
		KCNQ1 rs77307322
			GG	105	111	1
			GA	133	144	1.09	0.75 - 1.57	0.661302
			AA	56	49	0.83	0.52 - 1.34	0.454692
			GA or AA	189	193	1.01	0.72 - 1.42	0.960503
			Trend			0.94	0.74 - 1.18	0.597502
			Recessive			0.8	0.52 - 1.22	0.298492
		KCNQ1 rs6578270
			AA	204	207	1
			AG	99	104	0.99	0.7 - 1.4	0.964511
			GG	13	10	0.68	0.28 - 1.61	0.382603
			AG or GG	112	114	0.96	0.69 - 1.33	0.786189
			Trend			0.93	0.7 - 1.23	0.598812
			Recessive			0.68	0.28 - 1.61	0.381691
		KCNQ1 rs2237869
			CC	110	120	1
			CA	145	152	1.01	0.71 - 1.44	0.956512
			AA	61	49	0.72	0.45 - 1.15	0.176407
			CA or AA	206	201	0.92	0.66 - 1.29	0.636522
			Trend			0.88	0.7 - 1.1	0.254725
			Recessive			0.72	0.47 - 1.1	0.128236
		KCNQ1 rs736609
			GG	144	134	1
			GA	129	142	1.2	0.85 - 1.69	0.306059
			AA	31	37	1.31	0.76 - 2.27	0.324937
			GA or AA	160	179	1.22	0.88 - 1.69	0.232656
			Trend			1.16	0.91 - 1.48	0.223316
			Recessive			1.2	0.72 - 2.02	0.483985
		KCNQ1 rs2283152
			AA	88	79	1
			AG	151	164	1.32	0.9 - 1.95	0.159581
			GG	77	78	1.2	0.76 - 1.88	0.434591
			AG or GG	228	242	1.28	0.89 - 1.84	0.187307
			Trend			1.1	0.88 - 1.37	0.421818
			Recessive			1	0.69 - 1.44	0.984718
		KCNQ1 rs179431
			GG	137	138	1
			GA	140	152	1.01	0.72 - 1.41	0.958105
			AA	39	31	0.79	0.46 - 1.34	0.379333
			GA or AA	179	183	0.96	0.7 - 1.32	0.805745
			Trend			0.93	0.73 - 1.18	0.529523
			Recessive			0.78	0.47 - 1.3	0.345205
		KCNQ1 rs179435
			AA	149	165	1
			AG	138	133	0.81	0.58 - 1.13	0.206623
			GG	26	21	0.68	0.36 - 1.28	0.238805
			AG or GG	164	154	0.79	0.57 - 1.08	0.142495
			Trend			0.82	0.63 - 1.06	0.122753
			Recessive			0.76	0.41 - 1.39	0.368949
		KCNQ1 rs757086
			GG	188	193	1
			GA	102	110	0.97	0.69 - 1.37	0.858258
			AA	20	14	0.7	0.33 - 1.43	0.327377
			GA or AA	122	124	0.92	0.67 - 1.28	0.641192
			Trend			0.9	0.69 - 1.18	0.455165
			Recessive			0.7	0.34 - 1.43	0.335401
		KCNQ1 rs3944148
			GG	147	152	1
			GA	126	131	1.01	0.72 - 1.42	0.968197
			AA	36	32	0.79	0.46 - 1.36	0.399946
			GA or AA	162	163	0.96	0.7 - 1.32	0.794419
			Trend			0.93	0.73 - 1.18	0.543038
			Recessive			0.79	0.47 - 1.32	0.372204
		KCNQ1 rs16928429
			AA	284	277	1
			AG	28	39	1.41	0.84 - 2.39	0.201849
			GG	2	1	0.69	0.03 - 7.34	0.761574
			AG or GG	30	40	1.36	0.82 - 2.29	0.23554
			Trend			1.29	0.8 - 2.09	0.296117
			Recessive			0.66	0.03 - 7.09	0.740815
		KCNQ1 rs61509816
			GG	286	284	1
			GA	29	37	1.29	0.77 - 2.19	0.338283
			AA	1	0	0	-3.47699e+41	0.979938
			GA or AA	30	37	1.25	0.74 - 2.11	0.401442
			Trend			1.2	0.72 - 2	0.486032
			Recessive			0	-3.38327e+41	0.979897
		KCNQ1 rs7130209
			AA	124	113	1
			AG	139	158	1.33	0.94 - 1.89	0.107408
			GG	53	50	1.08	0.67 - 1.73	0.765127
			AG or GG	192	208	1.26	0.91 - 1.76	0.166733
			Trend			1.09	0.87 - 1.37	0.456272
			Recessive			0.92	0.59 - 1.41	0.687271
		KCNQ1 rs4539307
			GG	185	191	1
			GA	111	113	0.98	0.7 - 1.38	0.906714
			AA	20	17	0.81	0.4 - 1.62	0.55604
			GA or AA	131	130	0.95	0.69 - 1.32	0.776207
			Trend			0.94	0.72 - 1.22	0.648837
			Recessive			0.82	0.41 - 1.61	0.56392
		KCNQ1 rs4930122
			AA	118	110	1
			AG	143	163	1.32	0.93 - 1.87	0.126947
			GG	55	47	0.97	0.6 - 1.58	0.91499
			AG or GG	198	210	1.22	0.88 - 1.7	0.23877
			Trend			1.05	0.83 - 1.32	0.704981
			Recessive			0.83	0.54 - 1.28	0.407094
		KCNQ1 rs2283169
			AA	99	86	1
			AG	156	163	1.18	0.81 - 1.71	0.382054
			GG	61	72	1.38	0.87 - 2.18	0.170951
			AG or GG	217	235	1.23	0.87 - 1.76	0.23924
			Trend			1.17	0.94 - 1.47	0.167013
			Recessive			1.24	0.84 - 1.83	0.283793
		KCNQ1 rs7926356
			GG	186	191	1
			GA	115	117	1	0.72 - 1.4	0.996257
			AA	15	13	0.83	0.37 - 1.83	0.646019
			GA or AA	130	130	0.98	0.71 - 1.35	0.900839
			Trend			0.96	0.73 - 1.27	0.787155
			Recessive			0.83	0.38 - 1.81	0.642229
		KCNQ1 rs7101739
			GG	251	266	1
			GA	61	53	0.8	0.52 - 1.21	0.284188
			AA	4	2	0.47	0.06 - 2.52	0.396699
			GA or AA	65	55	0.78	0.51 - 1.17	0.225458
			Trend			0.78	0.53 - 1.13	0.189985
			Recessive			0.49	0.07 - 2.63	0.423734
		KCNQ1 rs7118348
			AA	303	300	1
			AT	13	21	1.69	0.83 - 3.55	0.156126
			AT or TT	13	21	1.69	0.83 - 3.55	0.156126
			Trend			1.69	0.83 - 3.55	0.156126
			Recessive					0.186887
		KCNQ1 rs2283171
			GG	107	110	1
			GA	141	149	1.01	0.7 - 1.44	0.966484
			AA	68	62	0.92	0.59 - 1.43	0.695884
			GA or AA	209	211	0.98	0.7 - 1.37	0.896908
			Trend			0.96	0.77 - 1.2	0.733108
			Recessive			0.91	0.61 - 1.35	0.64402
		KCNQ1 rs147604023
			AA	299	295	1
			AG	11	23	2.1	1.02 - 4.59	0.0505006
			AG or GG	11	23	2.1	1.02 - 4.59	0.0505006
			Trend			2.1	1.02 - 4.59	0.0505006
			Recessive					0.213402
		KCNQ1 rs2283174
			AA	171	164	1
			AG	127	130	1.05	0.75 - 1.46	0.786008
			GG	15	23	1.5	0.75 - 3.07	0.253321
			AG or GG	142	153	1.1	0.8 - 1.51	0.568573
			Trend			1.13	0.87 - 1.47	0.3669
			Recessive			1.47	0.75 - 2.97	0.266807
		KCNQ1 rs61871517
			GG	222	226	1
			GA	84	89	1	0.7 - 1.43	0.989375
			AA	10	5	0.53	0.16 - 1.55	0.264794
			GA or AA	94	94	0.95	0.67 - 1.34	0.770294
			Trend			0.91	0.67 - 1.24	0.552229
			Recessive			0.53	0.16 - 1.54	0.263489
		KCNQ1 rs2012323
			GG	237	247	1
			GA	74	72	0.96	0.66 - 1.41	0.840036
			AA	5	2	0.35	0.05 - 1.68	0.217309
			GA or AA	79	74	0.92	0.63 - 1.33	0.659798
			Trend			0.88	0.62 - 1.25	0.483734
			Recessive			0.35	0.05 - 1.69	0.22055
		KCNQ1 rs2283175
			GG	83	75	1
			GA	159	155	1.02	0.69 - 1.51	0.911336
			AA	58	68	1.22	0.76 - 1.97	0.417625
			GA or AA	217	223	1.08	0.74 - 1.56	0.70152
			Trend			1.1	0.87 - 1.4	0.436235
			Recessive			1.2	0.8 - 1.79	0.370668
		KCNQ1 rs58833300
			AA	296	292	1
			AG	20	29	1.5	0.83 - 2.76	0.188323
			AG or GG	20	29	1.5	0.83 - 2.76	0.188323
			Trend			1.5	0.83 - 2.76	0.188323
			Recessive					0.186887
		KCNQ1 rs1116714
			CC	153	143	1
			CA	149	141	1.01	0.73 - 1.41	0.933679
			AA	14	37	2.8	1.46 - 5.62	0.00254131
			CA or AA	163	178	1.17	0.85 - 1.61	0.339385
			Trend			1.32	1.02 - 1.7	0.0337599
			Recessive			2.78	1.49 - 5.48	0.00198683
		KCNQ1 rs4930129
			AA	160	157	1
			AC	142	138	0.99	0.71 - 1.38	0.963758
			CC	13	26	2	0.99 - 4.2	0.0585767
			AC or CC	155	164	1.08	0.78 - 1.48	0.646188
			Trend			1.17	0.9 - 1.52	0.248007
			Recessive			2	1.01 - 4.15	0.0516331
		KCNQ1 rs4930000
			GG	216	199	1
			GA	93	104	1.21	0.85 - 1.71	0.290328
			AA	6	18	3.29	1.32 - 9.37	0.0155405
			GA or AA	99	122	1.33	0.95 - 1.86	0.0937768
			Trend			1.39	1.04 - 1.86	0.025031
			Recessive			3.1	1.25 - 8.8	0.0206119
		KCNQ1 rs4930137
			AA	166	167	1
			AG	126	130	1	0.72 - 1.39	0.991076
			GG	24	24	1	0.54 - 1.86	0.993992
			AG or GG	150	154	1	0.73 - 1.37	0.990281
			Trend			1	0.78 - 1.28	0.990621
			Recessive			1	0.55 - 1.83	0.995974
		KCNQ1 rs10766212
			GG	173	196	1
			GA	129	111	0.78	0.56 - 1.09	0.141536
			AA	14	13	0.81	0.36 - 1.81	0.607616
			GA or AA	143	124	0.78	0.57 - 1.08	0.135713
			Trend			0.82	0.62 - 1.09	0.170918
			Recessive			0.9	0.4 - 1.98	0.785259
		KCNQ1 rs2106467
			CC	239	247	1
			CA	71	71	0.99	0.68 - 1.46	0.970736
			AA	5	3	0.62	0.12 - 2.63	0.523006
			CA or AA	76	74	0.97	0.67 - 1.41	0.867812
			Trend			0.95	0.67 - 1.34	0.757207
			Recessive			0.62	0.12 - 2.63	0.523699
		KCNQ1 rs12575958
			GG	274	275	1
			GA	40	44	1.1	0.69 - 1.77	0.684316
			GA or AA	40	44	1.1	0.69 - 1.77	0.684316
			Trend			1.1	0.69 - 1.77	0.684316
			Recessive					0.200038
		KCNQ1 rs10832417
			CC	143	153	1
			CA	140	142	0.91	0.65 - 1.27	0.566045
			AA	33	26	0.68	0.38 - 1.21	0.193495
			CA or AA	173	168	0.86	0.63 - 1.19	0.367783
			Trend			0.86	0.67 - 1.1	0.220023
			Recessive			0.72	0.41 - 1.24	0.23546
		KCNQ1 rs6578283
			AA	187	209	1
			AG	118	99	0.75	0.53 - 1.05	0.0969289
			GG	10	13	0.99	0.41 - 2.42	0.977289
			AG or GG	128	112	0.77	0.55 - 1.07	0.118812
			Trend			0.83	0.62 - 1.1	0.199508
			Recessive			1.1	0.46 - 2.66	0.835688
		KCNQ1 rs231348
			GG	243	261	1
			GA	72	57	0.7	0.47 - 1.05	0.0825789
			AA	1	2	1.83	0.17 - 40.04	0.627389
			GA or AA	73	59	0.72	0.48 - 1.06	0.0994247
			Trend			0.75	0.51 - 1.09	0.134449
			Recessive			1.98	0.18 - 43.33	0.581303
		KCNQ1 rs231362
			GG	231	252	1
			GA	83	66	0.72	0.49 - 1.05	0.0890312
			AA	2	3	1.95	0.31 - 15.16	0.472298
			GA or AA	85	69	0.74	0.51 - 1.08	0.121356
			Trend			0.79	0.55 - 1.12	0.189468
			Recessive			2.1	0.34 - 16.28	0.424831
		KCNQ1 rs61870802
			GG	265	275	1
			GA	49	46	0.88	0.56 - 1.37	0.563212
			AA	2	0	0	-2.50008e+35	0.981369
			GA or AA	51	46	0.85	0.54 - 1.32	0.464946
			Trend			0.82	0.53 - 1.26	0.374508
			Recessive			0	-2.6781e+35	0.981404
		KCNQ1 rs231359
			AA	184	205	1
			AC	119	103	0.79	0.56 - 1.11	0.169577
			CC	13	12	0.83	0.35 - 1.91	0.655857
			AC or CC	132	115	0.79	0.57 - 1.1	0.164164
			Trend			0.83	0.63 - 1.1	0.201068
			Recessive			0.9	0.39 - 2.07	0.806941
		KCNQ1 rs7128926
			AA	255	263	1
			AG	58	55	0.91	0.6 - 1.37	0.644245
			GG	3	3	1.09	0.2 - 6.08	0.914126
			AG or GG	61	58	0.92	0.61 - 1.38	0.670501
			Trend			0.93	0.64 - 1.36	0.715414
			Recessive			1.11	0.2 - 6.17	0.897874
		KCNQ1 rs117241550
			AA	236	248	1
			AT	76	72	0.89	0.61 - 1.29	0.535834
			TT	4	1	0.26	0.01 - 1.79	0.228921
			AT or TT	80	73	0.86	0.59 - 1.24	0.417853
			Trend			0.83	0.58 - 1.18	0.308427
			Recessive			0.26	0.01 - 1.83	0.238652
		KCNQ1 rs231358
			AA	304	318	1
			AG	12	3	0.26	0.06 - 0.85	0.0423449
			AG or GG	12	3	0.26	0.06 - 0.85	0.0423449
			Trend			0.26	0.06 - 0.85	0.0423449
			Recessive					0.186887
		KCNQ1 rs60837062
			AA	269	273	1
			AG	20	23	1.04	0.55 - 1.99	0.89428
			GG	0	3	1.80678e+06	0 -	0.97689
			AG or GG	20	26	1.18	0.63 - 2.22	0.600142
			Trend			1.29	0.73 - 2.33	0.384393
			Recessive			1.79971e+06	0 -	0.976891
		KCNQ1 rs75643572
			GG	281	289	1
			GA	34	32	0.91	0.54 - 1.53	0.724638
			AA	1	0	0	-3.17732e+41	0.979804
			GA or AA	35	32	0.88	0.53 - 1.48	0.642196
			Trend			0.86	0.52 - 1.43	0.561688
			Recessive			0	-3.21272e+41	0.97982
		KCNQ1 rs11023793
			AA	260	269	1
			AG	53	51	0.92	0.6 - 1.42	0.710779
			GG	3	1	0.41	0.02 - 3.26	0.439558
			AG or GG	56	52	0.9	0.59 - 1.37	0.61405
			Trend			0.88	0.59 - 1.31	0.526636
			Recessive			0.41	0.02 - 3.3	0.445931
		KCNQ1 rs231351
			GG	304	319	1
			GA	12	2	0.17	0.03 - 0.65	0.0231666
			GA or AA	12	2	0.17	0.03 - 0.65	0.0231666
			Trend			0.17	0.03 - 0.65	0.0231666
			Recessive					0.186887
		KCNQ1 rs10832548
			GG	189	203	1
			GA	117	108	0.85	0.61 - 1.19	0.344348
			AA	10	10	1	0.4 - 2.52	0.997893
			GA or AA	127	118	0.86	0.62 - 1.19	0.372374
			Trend			0.9	0.67 - 1.19	0.456507
			Recessive			1.06	0.42 - 2.65	0.900938
		KCNQ1 rs231841
			AA	242	258	1
			AC	67	61	0.83	0.56 - 1.24	0.364311
			CC	7	2	0.28	0.04 - 1.27	0.133872
			AC or CC	74	63	0.79	0.53 - 1.15	0.220357
			Trend			0.76	0.53 - 1.08	0.133042
			Recessive			0.29	0.04 - 1.32	0.144555
		KCNQ1 rs2283196
			AA	196	218	1
			AC	110	95	0.79	0.56 - 1.11	0.178928
			CC	10	8	0.69	0.25 - 1.82	0.456256
			AC or CC	120	103	0.78	0.56 - 1.09	0.148329
			Trend			0.8	0.6 - 1.08	0.145042
			Recessive			0.75	0.28 - 1.96	0.553233
		KCNQ1 rs78131
			GG	188	215	1
			GA	118	98	0.71	0.51 - 1	0.0526107
			AA	10	8	0.68	0.25 - 1.8	0.434587
			GA or AA	128	106	0.71	0.51 - 0.99	0.0441119
			Trend			0.75	0.55 - 1	0.0510042
			Recessive			0.76	0.28 - 2	0.57966
		KCNQ1 rs7938807
			CC	266	274	1
			CA	47	43	0.87	0.55 - 1.37	0.538197
			AA	1	2	1.44	0.13 - 31.58	0.76996
			CA or AA	48	45	0.88	0.56 - 1.38	0.578559
			Trend			0.9	0.59 - 1.39	0.636865
			Recessive			1.47	0.14 - 32.2	0.757491
		KCNQ1 rs2283200
			GG	211	226	1
			GA	97	89	0.85	0.6 - 1.21	0.362658
			AA	8	6	0.71	0.23 - 2.1	0.538073
			GA or AA	105	95	0.84	0.59 - 1.18	0.313683
			Trend			0.85	0.62 - 1.15	0.291564
			Recessive			0.74	0.24 - 2.19	0.594244
		KCNQ1 rs231846
			CC	265	277	1
			CA	45	38	0.78	0.48 - 1.24	0.294287
			AA	1	2	1.41	0.13 - 30.94	0.782325
			CA or AA	46	40	0.79	0.5 - 1.26	0.326894
			Trend			0.82	0.53 - 1.28	0.382609
			Recessive			1.46	0.14 - 31.97	0.761641
		KCNQ1 rs2283202
			GG	129	149	1
			GA	149	139	0.79	0.56 - 1.11	0.179185
			AA	38	31	0.69	0.4 - 1.19	0.188209
			GA or AA	187	170	0.77	0.56 - 1.07	0.11751
			Trend			0.82	0.64 - 1.04	0.106717
			Recessive			0.78	0.47 - 1.31	0.349176
		KCNQ1 rs2283205
			GG	184	183	1
			GA	111	118	1.05	0.75 - 1.47	0.775649
			AA	21	19	0.92	0.47 - 1.8	0.812062
			GA or AA	132	137	1.03	0.75 - 1.42	0.856541
			Trend			1	0.77 - 1.3	0.978422
			Recessive			0.91	0.47 - 1.74	0.765095
		KCNQ1 rs231884
			CC	308	314	1
			CG	8	7	0.85	0.29 - 2.47	0.768829
			CG or GG	8	7	0.85	0.29 - 2.47	0.768829
			Trend			0.85	0.29 - 2.47	0.768829
			Recessive					0.186887
		KCNQ1 rs12805655
			GG	210	203	1
			GA	88	98	1.17	0.82 - 1.67	0.381659
			AA	10	12	1.26	0.52 - 3.11	0.609849
			GA or AA	98	110	1.18	0.84 - 1.66	0.341863
			Trend			1.15	0.86 - 1.55	0.342106
			Recessive			1.2	0.5 - 2.94	0.686923
		KCNQ1 rs231916
			GG	163	170	1
			GA	128	130	0.94	0.68 - 1.32	0.738843
			AA	25	19	0.78	0.4 - 1.48	0.445174
			GA or AA	153	149	0.92	0.67 - 1.26	0.599816
			Trend			0.91	0.7 - 1.18	0.477998
			Recessive			0.8	0.42 - 1.49	0.479187
		KCNQ1 rs231915
			AA	145	150	1
			AG	144	138	0.94	0.67 - 1.31	0.694487
			GG	27	33	1.22	0.69 - 2.16	0.499836
			AG or GG	171	171	0.98	0.71 - 1.35	0.897904
			Trend			1.03	0.81 - 1.32	0.785245
			Recessive			1.26	0.73 - 2.18	0.410944
		KCNQ1 rs170786
			GG	194	183	1
			GA	103	117	1.19	0.85 - 1.67	0.317809
			AA	19	21	1.27	0.65 - 2.5	0.491971
			GA or AA	122	138	1.2	0.87 - 1.66	0.268712
			Trend			1.16	0.89 - 1.5	0.27555
			Recessive			1.19	0.61 - 2.31	0.612676
		KCNQ1 rs231908
			GG	99	95	1
			GA	135	151	1.11	0.77 - 1.61	0.577891
			AA	64	54	0.87	0.55 - 1.4	0.576121
			GA or AA	199	205	1.04	0.73 - 1.47	0.837869
			Trend			0.95	0.76 - 1.2	0.69558
			Recessive			0.82	0.54 - 1.24	0.348414
		KCNQ1 rs231907
			TT	179	171	1
			TA	112	125	1.16	0.83 - 1.63	0.387353
			AA	23	21	0.98	0.51 - 1.87	0.947917
			TA or AA	135	146	1.13	0.82 - 1.56	0.455037
			Trend			1.07	0.82 - 1.38	0.62287
			Recessive			0.92	0.49 - 1.73	0.797291
		KCNQ1 rs2283216
			GG	218	212	1
			GA	82	93	1.12	0.78 - 1.61	0.522664
			AA	15	15	1.05	0.49 - 2.23	0.902986
			GA or AA	97	108	1.11	0.79 - 1.56	0.538155
			Trend			1.08	0.82 - 1.42	0.607042
			Recessive			1.01	0.48 - 2.15	0.972895
		KCNQ1 rs1110724
			GG	146	143	1
			GA	127	128	1.04	0.74 - 1.47	0.804829
			AA	21	18	0.88	0.44 - 1.74	0.707979
			GA or AA	148	146	1.02	0.73 - 1.42	0.904864
			Trend			0.99	0.76 - 1.29	0.933237
			Recessive			0.86	0.44 - 1.67	0.656281
		KCNQ1 rs2283222
			AA	177	172	1
			AG	109	125	1.15	0.82 - 1.61	0.422215
			GG	28	21	0.81	0.43 - 1.49	0.499791
			AG or GG	137	146	1.08	0.78 - 1.49	0.6336
			Trend			1	0.78 - 1.28	0.997307
			Recessive			0.77	0.42 - 1.39	0.382188
		KCNQ1 rs72844254
			AA	296	297	1
			AC	17	21	1.04	0.53 - 2.07	0.909112
			CC	1	0	0	-3.2774e+41	0.979854
			AC or CC	18	21	0.99	0.5 - 1.94	0.965792
			Trend			0.94	0.49 - 1.79	0.840819
			Recessive			0	-3.26981e+41	0.97985
		KCNQ1 rs112908040
			GG	226	233	1
			GA	79	78	0.93	0.64 - 1.35	0.709058
			AA	11	9	0.66	0.26 - 1.66	0.380091
			GA or AA	90	87	0.9	0.63 - 1.28	0.549649
			Trend			0.88	0.65 - 1.2	0.428711
			Recessive			0.68	0.26 - 1.68	0.399663
		KCNQ1 rs11023996
			AA	185	198	1
			AG	112	100	0.79	0.56 - 1.11	0.174887
			GG	19	22	1.19	0.61 - 2.31	0.610718
			AG or GG	131	122	0.84	0.61 - 1.17	0.301793
			Trend			0.93	0.72 - 1.21	0.607672
			Recessive			1.29	0.68 - 2.49	0.440521
		KCNQ1 rs7924946
			GG	182	169	1
			GA	119	127	1.15	0.83 - 1.61	0.401769
			AA	15	25	1.76	0.89 - 3.56	0.106929
			GA or AA	134	152	1.22	0.89 - 1.68	0.220198
			Trend			1.23	0.95 - 1.6	0.113597
			Recessive			1.66	0.86 - 3.31	0.140788
		KCNQ1 rs11023999
			GG	106	103	1
			GA	147	151	1.04	0.73 - 1.49	0.828717
			AA	63	67	1.12	0.72 - 1.76	0.616245
			GA or AA	210	218	1.06	0.76 - 1.49	0.716783
			Trend			1.06	0.85 - 1.32	0.623768
			Recessive			1.1	0.74 - 1.63	0.650766
		KCNQ1 rs179785
			GG	79	78	1
			GA	161	161	0.94	0.63 - 1.39	0.75769
			AA	75	81	1.1	0.7 - 1.73	0.672803
			GA or AA	236	242	0.99	0.69 - 1.43	0.964666
			Trend			1.05	0.84 - 1.32	0.673914
			Recessive			1.15	0.79 - 1.66	0.463819
		KCNQ1 rs463535
			GG	281	286	1
			GA	34	32	0.88	0.52 - 1.48	0.630118
			AA	1	3	2.94	0.35 - 61.53	0.363043
			GA or AA	35	35	0.94	0.56 - 1.56	0.797872
			Trend			1	0.62 - 1.6	0.989348
			Recessive			2.98	0.36 - 62.4	0.356341
		KCNQ1 rs548566
			AA	197	200	1
			AG	103	100	0.91	0.65 - 1.29	0.603741
			GG	16	19	1.28	0.63 - 2.63	0.489318
			AG or GG	119	119	0.96	0.69 - 1.33	0.80702
			Trend			1.01	0.78 - 1.32	0.917035
			Recessive			1.32	0.66 - 2.69	0.431467
		KCNQ1 rs231877
			AA	171	182	1
			AC	122	114	0.85	0.61 - 1.19	0.355312
			CC	23	25	1.07	0.58 - 1.98	0.835135
			AC or CC	145	139	0.89	0.64 - 1.22	0.458586
			Trend			0.95	0.74 - 1.22	0.684683
			Recessive			1.14	0.62 - 2.08	0.674472
		KCNQ1 rs4255520
			AA	282	294	1
			AG	34	26	0.74	0.43 - 1.28	0.292005
			GG	0	1	476664	0 -	0.980518
			AG or GG	34	27	0.77	0.44 - 1.32	0.340579
			Trend			0.8	0.47 - 1.36	0.407981
			Recessive			492520	0 -	0.980469
		KCNQ1 rs2237881
			AA	230	233	1
			AG	73	78	1.04	0.71 - 1.51	0.854059
			GG	13	10	0.85	0.35 - 1.99	0.707089
			AG or GG	86	88	1.01	0.71 - 1.44	0.962646
			Trend			0.99	0.73 - 1.32	0.920332
			Recessive			0.84	0.35 - 1.97	0.691295
		KCNQ1 rs2237882
			GG	167	175	1
			GA	131	128	0.88	0.63 - 1.23	0.454085
			AA	18	18	1.09	0.54 - 2.21	0.811601
			GA or AA	149	146	0.9	0.66 - 1.24	0.538494
			Trend			0.95	0.73 - 1.24	0.721023
			Recessive			1.15	0.58 - 2.29	0.692936
		KCNQ1 rs12420943
			GG	296	304	1
			GA	19	15	0.78	0.38 - 1.59	0.493236
			GA or AA	19	15	0.78	0.38 - 1.59	0.493236
			Trend			0.78	0.38 - 1.59	0.493236
			Recessive					0.166662
		KCNQ1 rs12794000
			GG	209	211	1
			GA	89	94	1.06	0.74 - 1.51	0.755409
			AA	18	14	0.76	0.36 - 1.59	0.467441
			GA or AA	107	108	1.01	0.72 - 1.41	0.965245
			Trend			0.96	0.73 - 1.27	0.796394
			Recessive			0.75	0.35 - 1.55	0.435446
		KCNQ1 rs74049757
			GG	177	190	1
			GA	119	113	0.83	0.59 - 1.16	0.278281
			AA	20	18	0.94	0.47 - 1.86	0.855258
			GA or AA	139	131	0.84	0.61 - 1.16	0.30339
			Trend			0.9	0.69 - 1.16	0.407506
			Recessive			1.01	0.51 - 1.97	0.983684
		KCNQ1 rs149373
			AA	292	290	1
			AG	24	30	1.25	0.71 - 2.22	0.445901
			GG	0	1	417955	0 -	0.980714
			AG or GG	24	31	1.28	0.73 - 2.27	0.396999
			Trend			1.3	0.75 - 2.29	0.357489
			Recessive			412069	0 -	0.980735
		KCNQ1 rs234875
			CC	156	151	1
			CA	139	136	1.01	0.72 - 1.41	0.952797
			AA	21	34	1.64	0.91 - 3.03	0.103707
			CA or AA	160	170	1.09	0.8 - 1.5	0.580363
			Trend			1.16	0.9 - 1.49	0.243154
			Recessive			1.64	0.93 - 2.96	0.0947732
		KCNQ1 rs61869764
			AA	206	208	1
			AG	91	101	1.11	0.78 - 1.58	0.553243
			GG	19	12	0.6	0.27 - 1.27	0.186203
			AG or GG	110	113	1.02	0.73 - 1.42	0.902718
			Trend			0.94	0.72 - 1.24	0.666566
			Recessive			0.58	0.26 - 1.22	0.154932
		KCNQ1 rs234838
			AA	302	310	1
			AG	13	10	0.77	0.32 - 1.8	0.549136
			AG or GG	13	10	0.77	0.32 - 1.8	0.549136
			Trend			0.77	0.32 - 1.8	0.549136
			Recessive					0.168486
		KCNQ1 rs163171
			GG	103	133	1
			GA	162	134	0.66	0.47 - 0.94	0.0224748
			AA	51	54	0.82	0.51 - 1.32	0.4176
			GA or AA	213	188	0.7	0.5 - 0.98	0.0364975
			Trend			0.86	0.68 - 1.07	0.177687
			Recessive			1.04	0.68 - 1.59	0.868086
		KCNQ1 rs2074196
			CC	104	136	1
			CA	161	130	0.62	0.43 - 0.88	0.00767464
			AA	45	46	0.75	0.46 - 1.24	0.263959
			CA or AA	206	176	0.65	0.46 - 0.9	0.0109752
			Trend			0.8	0.63 - 1.01	0.0670261
			Recessive			0.98	0.62 - 1.55	0.944748
		KCNQ1 rs59809880
[truncated: 96 more rows]
